# Supplementary material for: Influence of socioeconomic status on the referral process to cardiac rehabilitation following acute coronary syndrome: a cross-sectional study
Source: PubMed Central journal article supplement — BMJ Open. 2020 Apr 9;10(4):e036088. doi: 10.1136/bmjopen-2019-036088 (PMC7170636; doi:10.1136/bmjopen-2019-036088), 2020-04-09
Supplement: bmjopen-2019-036088.draft_revisions.pdf [file bmjopen-2019-036088.draft_revisions.pdf]

# BMJ Open

BMJ Open is committed to open peer review. As part of this commitment we make the peer review history of every article we publish publicly available.

When an article is published we post the peer reviewers' comments and the authors' responses online. We also post the versions of the paper that were used during peer review. These are the versions that the peer review comments apply to.

The versions of the paper that follow are the versions that were submitted during the peer review process. They are not the versions of record or the final published versions. They should not be cited or distributed as the published version of this manuscript.

BMJ Open is an open access journal and the full, final, typeset and author-corrected version of record of the manuscript is available on our site with no access controls, subscription charges or pay-per-view fees (<http://bmjopen.bmj.com>).

If you have any questions on BMJ Open's open peer review process please email [info.bmjopen@bmj.com](mailto:info.bmjopen@bmj.com)

# BMJ Open

## **Influence of socio-economic status on the referral process to cardiac rehabilitation following acute coronary syndrome : a cross-sectional study**

|                               |                                                                                                                                                                                                                                                                                                                                                                                                                                                                                                                                                                                                                                                                            |
|-------------------------------|----------------------------------------------------------------------------------------------------------------------------------------------------------------------------------------------------------------------------------------------------------------------------------------------------------------------------------------------------------------------------------------------------------------------------------------------------------------------------------------------------------------------------------------------------------------------------------------------------------------------------------------------------------------------------|
| Journal:                      | <i>BMJ Open</i>                                                                                                                                                                                                                                                                                                                                                                                                                                                                                                                                                                                                                                                            |
| Manuscript ID                 | bmjopen-2019-036088                                                                                                                                                                                                                                                                                                                                                                                                                                                                                                                                                                                                                                                        |
| Article Type:                 | Original research                                                                                                                                                                                                                                                                                                                                                                                                                                                                                                                                                                                                                                                          |
| Date Submitted by the Author: | 02-Dec-2019                                                                                                                                                                                                                                                                                                                                                                                                                                                                                                                                                                                                                                                                |
| Complete List of Authors:     | Graversen, Christina Boesgaard; Aalborg University Hospital, Department of Cardiology, Department of Clinical Medicine<br>Johansen, Martin; Aalborg University Hospital, Unit of Biostatistics<br>Eichhorst, Regina; Slagelse Hospital, Department of Cardiology<br>Johnsen, Søren Paaske; Aalborg University, Danish Center for Clinical Health Services Research, Department of Clinical Medicine<br>Riahi, Sam; Aalborg University Hospital, Department of Cardiology, Department of Clinical Medicine<br>Holmberg, Teresa; University of Southern Denmark, National Institute of Public Health<br>Larsen, Mogens ; Aalborg University, Department of Clinical Medicine |
| Keywords:                     | Cardiac Epidemiology < CARDIOLOGY, Adult cardiology < CARDIOLOGY, Myocardial infarction < CARDIOLOGY                                                                                                                                                                                                                                                                                                                                                                                                                                                                                                                                                                       |
|                               |                                                                                                                                                                                                                                                                                                                                                                                                                                                                                                                                                                                                                                                                            |

SCHOLARONE™  
Manuscripts

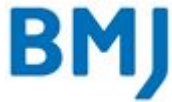

I, the Submitting Author has the right to grant and does grant on behalf of all authors of the Work (as defined in the below author licence), an exclusive licence and/or a non-exclusive licence for contributions from authors who are: i) UK Crown employees; ii) where BMJ has agreed a CC-BY licence shall apply, and/or iii) in accordance with the terms applicable for US Federal Government officers or employees acting as part of their official duties; on a worldwide, perpetual, irrevocable, royalty-free basis to BMJ Publishing Group Ltd ("BMJ") its licensees and where the relevant Journal is co-owned by BMJ to the co-owners of the Journal, to publish the Work in this journal and any other BMJ products and to exploit all rights, as set out in our [licence](#).

The Submitting Author accepts and understands that any supply made under these terms is made by BMJ to the Submitting Author unless you are acting as an employee on behalf of your employer or a postgraduate student of an affiliated institution which is paying any applicable article publishing charge ("APC") for Open Access articles. Where the Submitting Author wishes to make the Work available on an Open Access basis (and intends to pay the relevant APC), the terms of reuse of such Open Access shall be governed by a Creative Commons licence – details of these licences and which [Creative Commons](#) licence will apply to this Work are set out in our licence referred to above.

Other than as permitted in any relevant BMJ Author's Self Archiving Policies, I confirm this Work has not been accepted for publication elsewhere, is not being considered for publication elsewhere and does not duplicate material already published. I confirm all authors consent to publication of this Work and authorise the granting of this licence.

1  
2  
3  
4 1 **Title: Influence of socio-economic status on the referral process to cardiac**  
5  
6 2 **rehabilitation following acute coronary syndrome: a cross-sectional study**  
7  
8  
9

10 3 **Authors:**

11  
12 4 Christina Boesgaard Graversen<sup>\*a,b</sup>, Martin Nygård Johansen<sup>c</sup>, Regina Eichhorst<sup>d</sup>, Søren Paaske  
13  
14 5 Johnsen<sup>e</sup>, Sam Riahi<sup>a,b</sup>, Teresa Holmberg<sup>f</sup>, Mogens Lytken Larsen<sup>b</sup>  
15  
16

17 6 **Affiliations:**

- 18  
19 7 a. Department of Cardiology, Aalborg University Hospital, Aalborg, Denmark  
20  
21 8 b. Department of Clinical Medicine, Aalborg University, Aalborg, Denmark  
22  
23 9 c. Unit of Clinical Biostatistics, Aalborg University Hospital, Aalborg, Denmark  
24  
25 10 d. Department of Cardiology, Slagelse Hospital, Slagelse, Denmark  
26  
27 11 e. Danish Center for Clinical Health Services Research, Department of Clinical Medicine, Aalborg  
28  
29 12 University and Aalborg University Hospital, Aalborg, Denmark  
30  
31 13 f. National Institute of Public Health, University of Southern Denmark, Copenhagen, Denmark  
32  
33  
34

35 14 **Information about previous presentation of the whole or part of the work presented in the article:**

36  
37 15 Parts of the work has been presented in a poster format at the ESC Congress 2019.  
38  
39

40 16 **Sources of support, for all authors, for the work in the form of grants:**

41  
42 17 This work was supported by grants from the Karen Elise Jensen's Foundation and the Danish Heart  
43  
44 18 Foundation (18-R123-A8283-22081).  
45

46 19 **Disclaimers, if any:**

47  
48 20 None  
49

50 21 **Corresponding author:**

51  
52 22 Christina Boesgaard Graversen, postal address: Holger Danskes Vej 73, 2nd Floor Left, 2000  
53  
54 23 Frederiksberg, DK, mail: [c.graversen@rn.dk](mailto:c.graversen@rn.dk)  
55  
56

57 24 **Word count:** 2303 words  
58  
59  
60

## 25 Abstract

26 **Objective:** to assess socio-economic predictors for referral to CR after incident ACS by dividing the entire  
27 referral process into three phases (1. informed about CR, 2. willingness to participate in CR, and 3.  
28 assigned CR setting).

29 **Design:** Cross-sectional study

30 **Setting:** Department of Cardiology at a Danish University Hospital from 1 January 2011 to 31 December  
31 2014

32 **Participants:** A total of 1229 patients assessed for CR during hospitalisation with ACS were  
33 prospectively registered in the Rehab-North Register from 2011-2014. Socio-economic status (SES) was  
34 assessed using data from national registers, concerning: personal income, occupational status,  
35 educational level, and civil status. Patients were excluded if in one of the following criteria were fulfilled: 1)  
36 missing data on SES, or 2) acceptable reason for not informing patients about CR, including treatment with  
37 coronary artery bypass graft, transfer to another hospital, still under treatment, or death.

38 **Main outcome measures:** Outcomes were defined by dividing the referral process into three phases: 1.  
39 being informed about CR, 2. willingness to participate, and 3. assigned CR setting (in-hospital  
40 /community centre) after ACS.

41 **Results:** A total of 854 (69.5 %) patients were referred to CR. After adjustment for age, gender,  
42 diagnosis and comorbidity, high income level had the strongest association of referral to CR in all three  
43 phases (informed about CR: OR 2.17, 95% CI: 1.0- 4.64; willingness to participate in CR: OR 1.55, 95% CI:  
44 1.02-2.35; assigned in-hospital CR: OR 1.47, 95% CI: 0.91-2.36). High educational level showed similar  
45 tendencies but did not reach statistical significance. The results did not vary according to gender.

46 **Conclusion:** This is the first study to investigate the entire referral process to CR using a three-phase  
47 structure. It suggests income and education to influence all phases in the referral process to CR after  
48 suffering ACS.

1  
2  
3  
4 49 **Keywords:** Myocardial Infarction, Adult Cardiology, Cardiac Epidemiology

5  
6 50 **Strengths and limitations of this study**

- 7  
8  
9 51 - This is the first study to investigate the referral process to cardiac rehabilitation (CR) using a  
10  
11 52 three phase structure (information about CR, willingness to participate in CR, assigned CR  
12  
13 53 setting) rather than the person-level), which provides better knowledge in understanding why  
14  
15 54 social inequality persists in referral to cardiac rehabilitation.  
16  
17  
18 55 - Socio-economic variables were provided by highly validated Danish register data using the  
19  
20 56 unique 10-digit civil registration number that is given to all Danish citizens.  
21  
22 57 - Multiple regression analyses were used to minimise potential confounding.  
23  
24  
25 58 - Data was not gathered for specific scientific purposes and it cannot be ruled out that not all  
26  
27 59 patients admitted with ACS were identified. However, such loss was considered unsystematic  
28  
29 60 and unintended and should not pose a problem for bias introduction.  
30  
31

32  
33 61 **Introduction**

34  
35  
36 62 Low socio-economic status (SES) is associated with higher risk of developing Ischemic Heart Disease and  
37  
38 63 a poorer subsequent outcome, including a higher risk of recurrent cardiovascular events and cardiac-  
39  
40 64 related mortality.(1–5) Cardiac rehabilitation (CR) is an important step to reduce disease outcomes and  
41  
42 65 is an integral part of ischemic heart disease care as it aims to improve quality of life as well as patients'  
43  
44 66 physical, psychological, and social functioning.(4)  
45  
46  
47 67 CR comprises exercise therapy, psychological consulting, treatment-targeted therapy, and life-style  
48  
49 68 changing modules (dietary modification, and smoking cessation).(4) The program is a coordinated effort  
50  
51 69 made by cardiologists, nurses, physiotherapists, dietitians, and eventually occupational therapists. If  
52  
53 70 needed, psychologists, social workers, or priests may be included as well.(4)  
54  
55  
56  
57  
58  
59  
60

1  
2  
3  
4 71 The efficacy of CR in reducing cardiovascular mortality and risk of hospital readmissions is well-  
5  
6 72 documented.(6–8) It therefore seems irrational that international research in general continues to find  
7  
8 73 CR referral, participation, and completion rates to be unsatisfactory.(9–13)  
9  
10 74 Different socio-economic characteristics (income, educational level, occupational status, cohabiting  
11  
12 75 status) are shown to be associated with CR underutilization.(14) Low income and educational level have  
13  
14 76 irrespectively of type of health care system repeatedly been associated with limited participation and  
15  
16 77 completion rate.(11,15) It is consequently of major importance to eliminate the socio-economic  
17  
18 78 differences in CR if the inequality in ischemic disease burden is to be reduced.  
19  
20 79 Obstacles in referral to CR among patients with lower SES may be due to both personal- and system-  
21  
22 80 level barriers.(16) However, vulnerable elements in the referral process prone to socio-economic  
23  
24 81 inequality among patients with acute coronary syndrome (ACS) remain unexplored. By dividing the  
25  
26 82 referral process into three phases, it is possible to evaluate if such inequality is the result of selection of  
27  
28 83 patients at the system-level (information about CR, place of referral) rather than the person-level (wish  
29  
30 84 to participate in CR). To our knowledge, no study has analysed the entire referral process using such  
31  
32 85 three-phase structure while controlling for confounders in a population of patients surviving ACS.  
33  
34 86 Therefore, the objective of this study was to investigate how SES is associated with the patients'  
35  
36 87 chances of 1) being informed about CR, 2) willingness to participate, and 3) assigned CR setting (in-  
37  
38 88 hospital or community centre).  
39  
40  
41  
42  
43  
44

## 45 89 **Methods**

46  
47  
48 90 The study followed the STROBE guidelines for cross-sectional studies.(17)  
49

### 50 91 **Study design**

51  
52  
53 92 This population-based study used data from the Rehab-North Register. Its content has previously been  
54  
55 93 described.(16) In short, the Rehab-North Register holds data on all patients hospitalised at the  
56  
57  
58  
59  
60

1  
2  
3  
4 94 Department of Cardiology, Aalborg University Hospital from 1 January 2011 to 31 December 2014 with  
5  
6 95 a diagnosis of ACS. All were assessed for eligibility to CR using a questionnaire.(16)  
7

8  
9 96 In Denmark, CR fully or partially takes place in-hospital or at community centres. In-hospital CR is  
10  
11 97 reserved for high-risk patients and is structured with a more complex intervention. The Danish Public  
12  
13 98 Health System is tax paid, enabling CR to be free of charge for the patient.  
14  
15

## 16 99 **Patient and Public involvement statement**

17  
18  
19 100 No patients were involved in the design, or conduct, or reporting, or dissemination plans of our  
20  
21 101 research.  
22

## 23 102 **Study Population**

24  
25  
26 103 The study population was identified in the Rehab-North Register as patients diagnosed with ACS (ICD-  
27  
28 104 10: DI200, DI21). The registered diagnosis by Rehab-North was verified by linking data from the Rehab-  
29  
30 105 North register with the Danish National Patient Register (NPR) and the Danish Register of Causes of  
31  
32 106 Death.(18) If any discrepancy arose, the diagnosis registered in the NPR was selected.  
33

34  
35 107 Patients were excluded if in one of the following criteria were fulfilled: 1) missing data on SES 2)  
36  
37 108 acceptable reason for not informing patients about CR, including treatment with coronary artery bypass  
38  
39 109 graft, transfer to another hospital, still under treatment, or death.  
40  
41  
42 110

## 43 44 111 **Socio-economic status**

45  
46 112 Different indicators of SES (personal income, occupational status, educational level, and civil status)  
47  
48 113 were chosen, due to a priori knowledge about their proposed mechanisms associated to the outcome  
49  
50 114 variable. Ascertainment of socio-economic variables from national registers was done by linkage of a  
51  
52 115 unique personal number given to all Danish residents.  
53

54  
55 116 The Income Statistics Register provided information regarding both disposable personal income (low,  
56  
57 117 medium, high) calculated for the calendar year before disease onset, and occupational status  
58  
59  
60



1  
2  
3  
4 118 (employed, unemployed/out of workforce) set for the calendar year before disease onset.(19) A  
5  
6 119 person's highest obtained educational level (low, medium, high) was based on the International  
7  
8 120 Standard Classification of Education (ISCED)(20) from the Student's Register(21), and civil status  
9  
10 121 (married/partnership, divorced/unmarried /widow) from the Civil Registration System (CRS).(22)

## 122 **Outcomes**

123 Outcomes were defined by dividing the referral process into three phases: 1. being informed about CR,  
124 2. willingness to participate, and 3. assigned CR setting (in-hospital /community centre) after ACS.

125 All outcome information gathering were done during the patients' hospitalisation and included in the  
126 questionnaires that founded the Rehab-North Register.

127 As regional guidelines determined setting for CR: patients suffering ST-Elevated Myocardial Infarction  
128 (STEMI) or complicated Non-ST-Elevated Myocardial Infarction (NSTEMI) were offered in-hospital CR  
129 whereas patients with uncomplicated NSTEMI and Unstable Angina Pectoris (UAP) were offered CR in a  
130 community centre, we intended to investigate whether this structure was followed.

## 131 **Covariates**

132 The analysis model was constructed with a directed acyclic graph to reduce confounding (online  
133 supplementary material, figure 1).

134 Age was registered at time of diagnosis and categorized into three groups: < 65 years, 65-74 years, and  
135 ≥ 75 years. Information regarding age and gender was gathered from the CRS.(22) Comorbidity  
136 diagnoses were defined by the Charlson Comorbidity Index (CCI) and drawn from the NPR.(23)

## 137 **Statistical analysis**

138 Baseline characteristics of study population were summarised by frequencies and percentages. The  
139 association between socio-economic exposure variables and being informed about CR, willingness to  
140 participate, and assigned CR setting was assessed by crude (model 1) and multiple logistic regression  
141 adjusted for confounders (age, gender, diagnosis, CCI) (model 2). Results were presented in odds ratios

1  
2  
3  
4 142 (OR) with 95% confidence intervals (95% CI). Potential effect modification by gender was assessed by  
5  
6 143 stratification and likelihood-ratio tests as studies have found females to experience lower rates of  
7  
8 144 referral to CR compared to males.(10,24) Statistical analyses were performed using Stata Software  
9  
10 145 (v.15.1; Stata Corp. College Station, TX).

## 13 146 **Results**

16 147 Of the original cohort of 1721 patients diagnosed with ACS, only patients with no missing socio-  
17  
18 148 economic variables, and no acceptable reasons for not being informed about CR were included in the  
19  
20 149 study (online supplementary material, figure 2). This resulted in a study population comprising 1229  
21  
22 150 patients (73.8% male). The patients' baseline characteristics, stratified by diagnosis, are presented in  
23  
24 151 table 1. STEMI patients were relatively younger and still an available workforce with higher income. In  
25  
26 152 the study population, 1123 (91.4%) patients were informed about CR of which 854 (76.0%) patients  
27  
28 153 subsequently agreed to participate in the program. Of those, 349 (40.9%) patients were referred to CR  
29  
30 154 in a community centre and 505 (59.1%) patients were referred to in-hospital CR (figure 1).

31  
32  
33  
34  
35 155  
36  
37  
38  
39  
40  
41  
42  
43  
44  
45  
46  
47  
48  
49  
50  
51  
52  
53  
54  
55  
56  
57  
58  
59  
60

**Table 1:** Characteristics of study population stratified by diagnosis

|                              | Full population | STEMI      | NSTEMI     | UAP        |
|------------------------------|-----------------|------------|------------|------------|
| Characteristics              | n = 1229        | n = 402    | n = 711    | n = 116    |
| Male (n, %)                  | 907 (73.8)      | 322 (80.1) | 503 (70.7) | 82 (70.7)  |
| Age Group (years)            |                 |            |            |            |
| < 65                         | 591 (48.1)      | 227 (56.5) | 308 (43.3) | 56 (48.3)  |
| 65-74                        | 371 (30.2)      | 116 (28.9) | 215 (30.2) | 40 (34.5)  |
| ≥ 75                         | 267 (21.7)      | 59 (14.7)  | 188 (26.4) | 20 (17.2)  |
| Civil status (n, %)          |                 |            |            |            |
| Married/Partnership          | 793 (64.5)      | 253 (62.9) | 449 (63.2) | 91 (78.4)  |
| Divorced/Unmarried/Widow     | 436 (35.5)      | 149 (37.1) | 262 (36.8) | 25 (21.6)  |
| Occupational status (n, %)   |                 |            |            |            |
| Employed                     | 479 (39.0)      | 195 (48.5) | 240 (33.8) | 44 (37.9)  |
| Unemployed/Retired           | 750 (61.0)      | 207 (51.5) | 471 (66.2) | 72 (62.1)  |
| Educational level (n, %)     |                 |            |            |            |
| Low                          | 516 (42.0)      | 144 (35.8) | 322 (45.3) | 50 (43.1)  |
| Medium                       | 539 (43.9)      | 201 (50.0) | 293 (41.2) | 45 (38.8)  |
| High                         | 174 (14.2)      | 57 (14.2)  | 96 (13.5)  | 21 (18.1)  |
| Gross income, tertile (n, %) |                 |            |            |            |
| Low                          | 405 (33.0)      | 113 (28.1) | 251 (35.3) | 41 (35.3)  |
| Medium                       | 406 (33.0)      | 124 (30.8) | 247 (34.7) | 35 (30.2)  |
| High                         | 418 (34.0)      | 165 (41.0) | 213 (30.0) | 40 (34.5)  |
| Charlson Comorbidity Index   |                 |            |            |            |
| Low (0 points)               | 1088 (88.5)     | 358 (89.1) | 630 (88.6) | 100 (86.2) |
| Moderate/High (>0 points)    | 141 (11.5)      | 44 (10.9)  | 81 (11.4)  | 16 (13.8)  |

156 STEMI: ST-elevated myocardial infarction; NSTEMI: non-ST-elevated myocardial infarction; UAP: unstable angina

157 pectoris

1  
2  
3  
4 158 **Phase 1: SES and being informed about CR**

5  
6 159 Higher income and educational level had positive crude associations with being informed about CR.

7  
8 160 Whereas, being unemployed/retired had a negative association (table 2). These associations were

9  
10 161 greatly reduced after adjustment for age, gender, diagnosis, and CCI. The adjusted regression analysis

11  
12 162 found high income to be associated with being informed about CR (OR 2.17, 95% CI: 1.01; 4.64). High

13  
14 163 educational level was also associated with being informed about CR although the association did not

15  
16 164 reach statistical significance.

17  
18  
19 **Table 2:** Logistic regression model for being informed about cardiac rehabilitation

|                          | n, (%)       | Unadjusted |            | Multivariable adjusted* |           |
|--------------------------|--------------|------------|------------|-------------------------|-----------|
|                          |              | OR         | 95% CI     | OR                      | 95% CI    |
| Observations             | 1123 (100.0) |            |            |                         |           |
| Civil status             |              |            |            |                         |           |
| Married/Partnership      | 469 (41.8)   | 1 (ref.)   |            | 1 (ref.)                |           |
| Divorced/Unmarried/Widow | 654 (58.2)   | 0.64       | 0.43-0.95  | 0.76                    | 0.49-1.19 |
| Occupational status      |              |            |            |                         |           |
| Employed                 | 735 (65.4)   | 1 (ref.)   |            | 1 (ref.)                |           |
| Unemployed/Retired       | 388 (34.6)   | 0.15       | 0.07-0.28  | 0.46                    | 0.20-1.07 |
| Educational level        |              |            |            |                         |           |
| Low                      | 452 (40.2)   | 1 (ref.)   |            | 1 (ref.)                |           |
| Medium                   | 505 (45.0)   | 2.10       | 1.36-3.25  | 1.17                    | 0.72-1.89 |
| High                     | 166 (14.8)   | 2.94       | 1.38-6.26  | 1.60                    | 0.72-3.54 |
| Income, tertiles         |              |            |            |                         |           |
| Low                      | 342 (30.5)   | 1 (ref.)   |            | 1 (ref.)                |           |
| Medium                   | 374 (33.3)   | 2.15       | 1.37-3.38  | 1.40                    | 0.86-2.28 |
| High                     | 407 (36.2)   | 6.82       | 3.54-13.14 | 2.17                    | 1.01-4.64 |

20  
21  
22  
23  
24  
25  
26  
27  
28  
29  
30  
31  
32  
33  
34  
35  
36  
37  
38  
39  
40  
41  
42  
43  
44  
45  
46  
47  
48  
49  
50  
51  
52  
53  
54  
55  
56  
57  
58  
59  
60  
\* Adjusted for age, gender, diagnosis, Charlson Comorbidity Index. OR: odds ratio; CI: confidence interval

165

1  
2  
3  
4 166 **Phase 2: SES and willingness to participate in CR**

5  
6 167 High income, high educational level, and being single-living (divorced/unmarried/widow) were all  
7  
8 168 associated with a higher likelihood of willingness to participate in CR in the crude analyses (table 3).  
9  
10 169 After adjustment, high income level had the highest OR (OR 1.55, 95% CI: 1.02; 2.35) in relation to  
11  
12 170 willingness to participate. A similar pattern was observed for high educational level although the  
13  
14 171 association was not statistically significant (OR 1.60, 95% CI: 0.78; 1.88). Likewise, being single-living  
15  
16 172 was also associated with willingness to participate in CR, although, the estimates did not reach  
17  
18 173 statistical significance (OR 1.28, 95% CI: 0.93; 1.76).  
19  
20  
21

22 **Table 3:** Logistic regression model for willingness to participate in cardiac rehabilitation

|                          | n (%)       | Unadjusted |           | Multiple adjustment* |           |
|--------------------------|-------------|------------|-----------|----------------------|-----------|
|                          |             | OR         | 95% CI    | OR                   | 95% CI    |
| Observations             | 854 (100.0) |            |           |                      |           |
| Civil status             |             |            |           |                      |           |
| Married/Partnership      | 388 (45.4)  | 1 (ref.)   |           | 1 (ref.)             |           |
| Divorced/Unmarried/Widow | 466 (54.6)  | 1.33       | 0.99-1.79 | 1.28                 | 0.93-1.76 |
| Occupational status      |             |            |           |                      |           |
| Employed                 | 546 (63.9)  | 1 (ref.)   |           | 1 (ref.)             |           |
| Unemployed/Retired       | 308 (36.1)  | 0.52       | 0.39-0.69 | 0.93                 | 0.62-1.40 |
| Educational level        |             |            |           |                      |           |
| Low                      | 322 (37.7)  | 1 (ref.)   |           | 1 (ref.)             |           |
| Medium                   | 405 (47.4)  | 1.64       | 1.21-2.20 | 1.36                 | 0.98-1.88 |
| High                     | 127 (14.9)  | 1.31       | 0.87-1.99 | 1.21                 | 0.78-1.88 |
| Income, tertiles         |             |            |           |                      |           |
| Low                      | 229 (26.8)  | 1 (ref.)   |           | 1 (ref.)             |           |
| Medium                   | 288 (33.7)  | 1.65       | 1.19-2.30 | 1.35                 | 0.94-1.94 |
| High                     | 337 (39.5)  | 2.38       | 1.69-3.34 | 1.55                 | 1.02-2.35 |

\* Adjusted for age, gender, diagnosis, Charlson Comorbidity Index. OR: odds ratio; CI: confidence interval

174

### 175 Phase 3: SES and assigned CR setting

176 Table 4 shows the association of SES on being assigned to in-hospital CR compared to CR in a  
 177 community centre. High income was associated with referral to being assigned to in-hospital CR (OR:  
 178 2.10, 95% CI: 1.49; 2.97) but the association was attenuated after adjustment for confounders (income:  
 179 adjusted OR: 1.47, 95% CI: 0.91; 2.36).

**Table 4:** Logistic regression model for assigned cardiac rehabilitation setting

|                          | n (%)       | Unadjusted |           | Multiple adjustment* |           |
|--------------------------|-------------|------------|-----------|----------------------|-----------|
|                          |             | OR         | 95% CI    | OR                   | 95% CI    |
| Observations             | 505 (100.0) |            |           |                      |           |
| Civil status             |             |            |           |                      |           |
| Married/Partnership      | 268 (53.1)  | 1 (ref.)   |           | 1 (ref.)             |           |
| Divorced/Unmarried/Widow | 237 (46.9)  | 1.13       | 0.85-1.51 | 1.20                 | 0.84-1.69 |
| Occupational status      |             |            |           |                      |           |
| Employed                 | 317 (62.8)  | 1 (ref.)   |           | 1 (ref.)             |           |
| Unemployed/Retired       | 188 (37.2)  | 0.46       | 0.35-0.61 | 0.75                 | 0.49-1.15 |
| Educational level        |             |            |           |                      |           |
| Low                      | 177 (35.0)  | 1 (ref.)   |           | 1 (ref.)             |           |
| Medium                   | 248 (49.1)  | 1.29       | 0.96-1.74 | 0.90                 | 0.63-1.30 |
| High                     | 80 (15.8)   | 1.39       | 0.91-2.13 | 1.20                 | 0.72-1.99 |
| Income, tertiles         |             |            |           |                      |           |
| Low                      | 115 (22.8)  | 1 (ref.)   |           | 1 (ref.)             |           |
| Medium                   | 161 (31.9)  | 1.26       | 0.89-1.78 | 1.14                 | 0.73-1.78 |
| High                     | 229 (45.3)  | 2.10       | 1.49-2.97 | 1.47                 | 0.91-2.36 |

\* Adjusted for age, gender, diagnosis, Charlson Comorbidity Index. OR: odds ratio; CI: confidence interval

## 180 **Supplementary analyses**

181 The analyses were stratified by gender in a supplementary analysis. The results were not substantially  
182 different from the main analysis.

## 183 **Discussion**

184 In this study, the referral process to CR was assessed using a three-phase structure: 1. informed about  
185 CR, 2. willingness to participate in CR, and 3. assigned CR setting. We observed patients with low SES to  
186 have lower odds of being informed about CR, lower willingness to participate in CR, and to be less often  
187 assigned in-hospital CR. Specifically, high income was associated with referral to CR in all phases of the  
188 referral process. Moreover, high educational level had a similar pattern, but the association did not  
189 reach statistical significance.

190 Overall, 69.5% of the patients were referred to CR, which is in accordance with earlier findings (22-  
191 81.5%).(9,10,24,25) Notably, in one study strikingly 86% was referred to CR after usage of a social  
192 differentiated intervention program.(26) However, it would be difficult to reproduce such a result in an  
193 observational study without this specific purpose.

194 In international studies younger age, male gender, living with a partner, high educational level, and high  
195 gross income were found to be predictors of CR referral.(10,25,27) This inequality in CR referral causes  
196 concern as participation helps patients implement needed behavioural changes, which reduces cardiac-  
197 related deaths.(6) Patients with low SES often have biological, behavioural, and psychosocial  
198 disadvantages that may accelerate risk of cardiovascular diseases. Therefore, the need of referral,  
199 attendance, and completion of CR should be prioritized in this patient group.(1,2) Our results found  
200 high income and high educational level to be associated with higher OR's throughout the referral  
201 process. We found single-living to be potentially associated with the willingness to participate in CR. If  
202 such an association is reproducible in later studies, then attention should focus on these patients  
203 without a partner, who less often receive referral to CR, which has been attributed to lack of social

1  
2  
3  
4 204 support.(27) It is highly important that patients are well-informed about CR to make a well-considered  
5  
6 205 decision regarding participation.  
7

8 206 An earlier study, assessed by crude analyses the referral process to CR on patients hospitalised for a  
9  
10 207 diverse range of incidental cardiac diseases and observed similar socio-economic determinants as  
11  
12 208 predictors for referral as seen in this present study.(16)  
13  
14

15 209  
16  
17 210 Definition of SES is a conceptual challenge often solved by use of personal/family income, educational  
18  
19 211 level, civil status, and/or occupation. There is no consensus on which parameters to use as indicators of  
20  
21 212 SES. It has been argued to use single variables as proxy measurements for SES despite different causal  
22  
23 213 pathways. However, others find it problematic only to estimate SES by one parameter, as this may  
24  
25 214 increase the risk of residual confounding by unmeasured socio-economic circumstances.(1,28)  
26  
27

28 215 Moreover, the effect of socio-economic variables seems rather outcome-related and is suggested not to  
29  
30 216 be used interchangeably without thorough consideration.(29) As our central interest was to investigate  
31  
32 217 the impact of SES on the referral process to CR, and therefore use SES as exposure variable, we a priori  
33  
34 218 hypothesized the different variables all to be linked to our outcome measures. The risk of such an  
35  
36 219 approach was the introduction of collinearity. However, research finds e.g. educational level,  
37  
38 220 occupation, and income to measure different phenomena, to have different causal mechanisms, and in  
39  
40 221 part to be explained by other socio-economic parameters.(29,30) Since literature finds income,  
41  
42 222 educational level, occupational status, and civil status to be important determinants for referral,  
43  
44 223 participation, and completion of CR, it seemed most appropriate to include all variables in order to  
45  
46 224 answer our research questions. The consequence of this approach was that we cannot get a single  
47  
48 225 estimate that illustrates the effect of SES.  
49  
50  
51  
52

53 226  
54  
55 227 Some caution must be taken when interpreting the results of our study. Firstly, data was not gathered  
56  
57 228 for specific scientific purposes and it cannot be ruled out that some patients admitted with ACS were  
58  
59  
60



1  
2  
3  
4 229 not included in the Rehab-North Register. However, such loss was considered unsystematic and  
5  
6 230 unintended and should not pose a problem for bias introduction. Secondly, use of register data  
7  
8 231 minimized risk of information bias, due to nationwide good algorithms for correct diagnosis coding.  
9  
10 232 Despite linkage to other registers, risk of residual or unmeasured confounding may be present.(31)  
11  
12 233 Thirdly, there may be a risk of residual or unaccounted confounding, if data on confounding variables  
13  
14 234 was not classified with adequate precision. Fourthly, several of the results only showed weak  
15  
16 235 association, which most likely was a consequence of the rather small study population. Therefore, it  
17  
18 236 cannot be assumed that there was no association and use of a national cohort may find more  
19  
20 237 conclusive results.  
21  
22  
23  
24 238 Participation and completion rates of in-hospital CR and CR in community centres remained unexplored  
25  
26 239 as our study only focused on the referral process to CR.  
27  
28

## 29 240 **Conclusion**

30  
31  
32 241 High income and educational level were associated with a larger chance of being informed about CR,  
33  
34 242 willingness to participate in CR, and assigned in-hospital CR in patients with ACS.  
35  
36  
37 243  
38  
39

40 244 **Acknowledgements:** None  
41

42 245 **Contributorship statement:** CBG, RE, and MLL contributed to study design and acquisition  
43  
44  
45 246 of the data. CBG, MNJ, and MLL analysed and interpreted the data. SPJ, SR, and THO contributed to  
46  
47 247 interpretation. CBG drafted the initial manuscript and all authors critically revised the manuscript and  
48  
49 248 gave final approval.  
50  
51

52 249 **Ethics:** The study is approved by the Danish Data Protection Agency (project number: 2008-58-0028)  
53  
54  
55 250 and the Danish Patient Safety Authority (3-3013-2763/1). In Denmark, no written consent is needed for  
56  
57 251 use of such register-based data.  
58  
59  
60

1  
2  
3  
4 252 **Funding:** This work was supported by the Karen Elise Jensen's Foundation, and the Danish Heart  
5  
6  
7 253 Foundation grant number: 18-R123-A8283-22081. The funders had no role in planning or conducting  
8  
9 254 the study.

10  
11 255 **Competing interest:** None declared

12  
13  
14  
15 256 **Data sharing statement:** No additional data available

16  
17  
18 257  
19  
20 258 **References**

- 21  
22  
23 259 1. Havranek EP, Mujahid MS, Barr DA, et al. Social determinants of risk and outcomes for  
24  
25 260 cardiovascular disease: A scientific statement from the American Heart Association. *Circulation*.  
26  
27 261 2015;132(9):873–98.
- 28  
29  
30 262 2. Schultz WM, Kelli HM, Lisko JC, et al. Socioeconomic Status and Cardiovascular Outcomes.  
31  
32 263 *Circulation* [Internet]. 2018;137(20):2166–78.
- 33  
34  
35 264 3. Ohm J, Skoglund PH, Discacciati A, et al. Socioeconomic status predicts second cardiovascular  
36  
37 265 event in 29,226 survivors of a first myocardial infarction. *Eur J Prev Cardiol*. 2018;25(9):985–93.
- 38  
39  
40  
41 266 4. Piepoli MF, Corra U, Adamopoulos S, et al. Secondary prevention in the clinical management of  
42  
43 267 patients with cardiovascular diseases . Core components , standards and outcome measures for  
44  
45 268 referral and delivery. *Eur J Prev Cardiol*. 2014;21(6):664–81.
- 46  
47  
48 269 5. Rasmussen JN, Rasmussen S, Gislason GH, et al. Mortality after acute myocardial infarction  
49  
50 270 according to income and education. *J Epidemiol Community Health*. 2006;60(4):351–6.
- 51  
52  
53 271 6. Anderson L, Oldridge N, Thompson DR, et al. Exercise-Based Cardiac Rehabilitation for Coronary  
54  
55 272 Heart Disease. *J Am Coll Cardiol*. 2016;67(1):1–12.
- 56  
57  
58 273 7. Anderson LJ, Taylor RS. Cardiac rehabilitation for people with heart disease: An overview of  
59  
60

- 1  
2  
3  
4 274 Cochrane systematic reviews. *Int J Cardiol.* 2014;177(2):348–61.  
5  
6 275 8. Rauch B, Davos CH, Doherty P, et al. The prognostic effect of cardiac rehabilitation in the era of  
7  
8 acute revascularisation and statin therapy: A systematic review and meta-analysis of randomized  
9 276  
10 and non-randomized studies - The Cardiac Rehabilitation Outcome Study (CROS). *Eur J Prev*  
11 277  
12 *Cardiol.* 2016;23(18):1914–39.  
13 278  
14  
15  
16 279 9. Sumner J, Grace SL, Doherty P. Predictors of Cardiac Rehabilitation Utilization in England :  
17  
18 280 Results From the National Audit. *J Am Heart Assoc.* 2016;1–7.  
19  
20  
21 281 10. Colella TJ, Gravely S, Marzolini S, et al. Sex bias in referral of women to outpatient cardiac  
22  
23 282 rehabilitation? A meta-analysis. *Eur J Prev Cardiol.* 2015;22(4):423–41.  
24  
25  
26 283 11. Martin B-J, Hauer T, Arena R, et al. Cardiac Rehabilitation Attendance and Outcomes in Coronary  
27  
28 284 Artery Disease Patients. *Circulation.* 2012;126(6):677–87.  
29  
30  
31 285 12. Piepoli MF, Hoes AW, Agewall S, et al. 2016 European Guidelines on cardiovascular disease  
32  
33 286 prevention in clinical practice. *Eur Heart J.* 2016;37(29):2315–81.  
34  
35  
36 287 13. Smith SC, Benjamin EJ, Bonow RO, et al. AHA/ACCF secondary prevention and risk reduction  
37  
38 288 therapy for patients with coronary and other atherosclerotic vascular disease: 2011 update: A  
39  
40 289 guideline from the American Heart Association and American College of Cardiology Foundation.  
41  
42 290 *Circulation.* 2011;124(22):2458–73.  
43  
44  
45  
46 291 14. Gaalema DE, Elliott RJ, Morford ZH, et al. Effect of Socioeconomic Status on Propensity to  
47  
48 292 Change Risk Behaviors Following Myocardial Infarction : Implications for Healthy Lifestyle  
49  
50 293 Medicine. *Prog Cardiovasc Dis [Internet].* 2017;60(1):159–68.  
51  
52  
53  
54 294 15. Nielsen KM, Faergeman O, Foldspang A, et al. Cardiac rehabilitation: Health characteristics and  
55  
56 295 socio-economic status among those who do not attend. *Eur J Public Health.* 2008;18(5):479–83.  
57  
58  
59 296 16. Graversen CB, Eichhorst R, Ravn L, et al. Social inequality and barriers to cardiac rehabilitation in  
60

- 1  
2  
3  
4 297 the rehab-North register. *Scand Cardiovasc J* [Internet]. 2017;51(6):316–22.  
5  
6 298 17. von Elm E, Altman DG, Egger M, et al. The Strengthening the Reporting of Observational Studies  
7  
8 299 in Epidemiology (STROBE) statement: guidelines for reporting observational studies. *J Clin*  
9  
10 300 *Epidemiol.* 2008;61(4):344–9.  
11  
12  
13 301 18. Madsen M, Davidsen M, Rasmussen S, et al. The validity of the diagnosis of acute myocardial  
14  
15 302 infarction in routine statistics: A comparison of mortality and hospital discharge data with the  
16  
17 303 Danish MONICA registry. *J Clin Epidemiol.* 2003;56(2):124–30.  
18  
19  
20 304 19. Baadsgaard M, Quitzau J. Danish registers on personal income and transfer payments. *Scand J*  
21  
22 305 *Public Health.* 2011;39(7):103–5.  
23  
24  
25 306 20. Eurostat Statistics Explained. International Standard Classification of Education (ISCED). URL:  
26  
27 307 [https://ec.europa.eu/eurostat/statistics-](https://ec.europa.eu/eurostat/statistics-explained/index.php/International_Standard_Classification_of_Education_(ISCED))  
28  
29 308 [explained/index.php/International\\_Standard\\_Classification\\_of\\_Education\\_\(ISCED\)](https://ec.europa.eu/eurostat/statistics-explained/index.php/International_Standard_Classification_of_Education_(ISCED)). Access date:  
30  
31 309 November 7, 2019.  
32  
33  
34 310 21. Jensen VM, Rasmussen a. W. Danish education registers. *Scand J Public Health.* 2011;39(7  
35  
36 311 *Suppl):91–4.*  
37  
38  
39 312 22. Pedersen CB. The Danish Civil Registration System. *Scand J Public Health.* 2011;39(7 suppl):22–5.  
40  
41  
42 313 23. Thygesen SK, Christiansen CF, Lash TL, et al. Predictive value of coding of diagnoses in the  
43  
44 314 charlson comorbidity index in the Danish national registry of patients. *Pharmacoepidemiol Drug*  
45  
46 315 *Saf.* 2009;18 (S1):S189.  
47  
48  
49 316 24. Colbert JD, Martin B-J, Haykowsky MJ, et al. Cardiac rehabilitation referral, attendance and  
50  
51 317 mortality in women. *Eur J Prev Cardiol.* 2014;22(8):979–86.  
52  
53  
54 318 25. Brown TM, Hernandez AF, Bittner V, et al. Predictors of Cardiac Rehabilitation Referral in  
55  
56 319 Coronary Artery Disease Patients. Findings From the American Heart Association’s Get With The  
57  
58  
59  
60

- 1  
2  
3  
4 320 Guidelines Program. *J Am Coll Cardiol*. 2009;54(6):515–21.  
5  
6 321 26. Meillier LK, Nielsen KM, Larsen FB, et al. Socially differentiated cardiac rehabilitation: Can we  
7  
8 322 improve referral, attendance and adherence among patients with first myocardial infarction?  
9  
10 323 *Scand J Public Health*. 2012;40(3):286–93.  
11  
12  
13  
14 324 27. Cortés O, Arthur HM. Determinants of referral to cardiac rehabilitation programs in patients  
15  
16 325 with coronary artery disease: A systematic review. *Am Heart J*. 2006;151(2):249–56.  
17  
18  
19 326 28. Galobardes B, Shaw M, Lawlor DA, et al. Indicators of socioeconomic position (part 1). *J*  
20  
21 327 *Epidemiol Community Health*. 2006;60(1):7–12.  
22  
23  
24 328 29. Geyer S, Hemström Ö, Peter R, et al. Education, income, and occupational class cannot be used  
25  
26 329 interchangeably in social epidemiology. Empirical evidence against a common practice. *J*  
27  
28 330 *Epidemiol Community Health*. 2006;60(9):804–10.  
29  
30  
31 331 30. Lahelma E, Martikainen P, Laaksonen M, et al. Pathways between socioeconomic determinants  
32  
33 332 of health. *J Epidemiol Community Health*. 2004;58(4):327–32.  
34  
35  
36 333 31. Schmidt M, Schmidt SAJ, Sandegaard JL, et al. The Danish National patient registry: A review of  
37  
38 334 content, data quality, and research potential. *Clin Epidemiol*. 2015;7:449–90.  
39  
40  
41  
42 335

43  
44  
45 336 **Figure legends:**

46  
47 337 Figure 1: Flowchart of the referral process to cardiac rehabilitation  
48  
49  
50  
51  
52  
53  
54  
55  
56  
57  
58  
59  
60

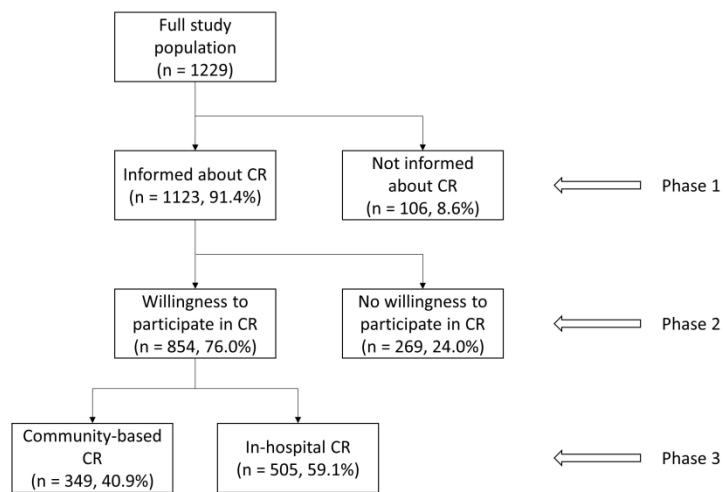

Figure 1: Flowchart of the referral process to cardiac rehabilitation

338x190mm (300 x 300 DPI)

## Online supplementary material

Figure S1: Directed acyclic graph

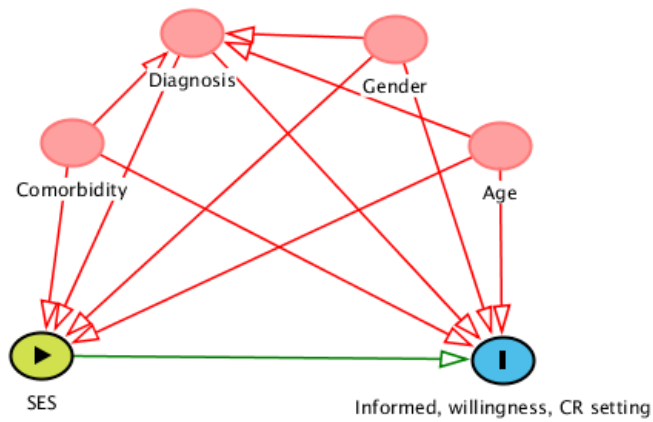

Figure S2: Flowchart of study population

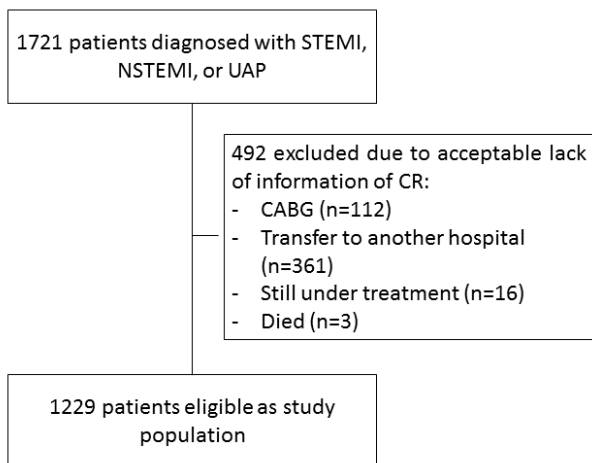

STEMI: ST-Elevated Myocardial Infarction; NSTEMI: Non-ST-Elevated Myocardial Infarction; UAP: Unstable Angina Pectoris; CR: cardiac rehabilitation; CABG: coronary artery bypass graft

## STROBE Statement—checklist of items that should be included in reports of observational studies

|                              | Item No | Recommendation                                                                                                                                                                                                                                                                                                                                                                                                                                                                                                                                                                                                                                                                                   |
|------------------------------|---------|--------------------------------------------------------------------------------------------------------------------------------------------------------------------------------------------------------------------------------------------------------------------------------------------------------------------------------------------------------------------------------------------------------------------------------------------------------------------------------------------------------------------------------------------------------------------------------------------------------------------------------------------------------------------------------------------------|
| <b>Title and abstract</b>    | 1       | (a) Indicate the study's design with a commonly used term in the title or the abstract<br>(b) Provide in the abstract an informative and balanced summary of what was done and what was found                                                                                                                                                                                                                                                                                                                                                                                                                                                                                                    |
| <b>Introduction</b>          |         |                                                                                                                                                                                                                                                                                                                                                                                                                                                                                                                                                                                                                                                                                                  |
| Background/rationale         | 2       | Explain the scientific background and rationale for the investigation being reported                                                                                                                                                                                                                                                                                                                                                                                                                                                                                                                                                                                                             |
| Objectives                   | 3       | State specific objectives, including any prespecified hypotheses                                                                                                                                                                                                                                                                                                                                                                                                                                                                                                                                                                                                                                 |
| <b>Methods</b>               |         |                                                                                                                                                                                                                                                                                                                                                                                                                                                                                                                                                                                                                                                                                                  |
| Study design                 | 4       | Present key elements of study design early in the paper                                                                                                                                                                                                                                                                                                                                                                                                                                                                                                                                                                                                                                          |
| Setting                      | 5       | Describe the setting, locations, and relevant dates, including periods of recruitment, exposure, follow-up, and data collection                                                                                                                                                                                                                                                                                                                                                                                                                                                                                                                                                                  |
| Participants                 | 6       | (a) <i>Cohort study</i> —Give the eligibility criteria, and the sources and methods of selection of participants. Describe methods of follow-up<br><i>Case-control study</i> —Give the eligibility criteria, and the sources and methods of case ascertainment and control selection. Give the rationale for the choice of cases and controls<br><i>Cross-sectional study</i> —Give the eligibility criteria, and the sources and methods of selection of participants<br>(b) <i>Cohort study</i> —For matched studies, give matching criteria and number of exposed and unexposed<br><i>Case-control study</i> —For matched studies, give matching criteria and the number of controls per case |
| Variables                    | 7       | Clearly define all outcomes, exposures, predictors, potential confounders, and effect modifiers. Give diagnostic criteria, if applicable                                                                                                                                                                                                                                                                                                                                                                                                                                                                                                                                                         |
| Data sources/<br>measurement | 8*      | For each variable of interest, give sources of data and details of methods of assessment (measurement). Describe comparability of assessment methods if there is more than one group                                                                                                                                                                                                                                                                                                                                                                                                                                                                                                             |
| Bias                         | 9       | Describe any efforts to address potential sources of bias                                                                                                                                                                                                                                                                                                                                                                                                                                                                                                                                                                                                                                        |
| Study size                   | 10      | Explain how the study size was arrived at                                                                                                                                                                                                                                                                                                                                                                                                                                                                                                                                                                                                                                                        |
| Quantitative variables       | 11      | Explain how quantitative variables were handled in the analyses. If applicable, describe which groupings were chosen and why                                                                                                                                                                                                                                                                                                                                                                                                                                                                                                                                                                     |
| Statistical methods          | 12      | (a) Describe all statistical methods, including those used to control for confounding<br>(b) Describe any methods used to examine subgroups and interactions<br>(c) Explain how missing data were addressed<br>(d) <i>Cohort study</i> —If applicable, explain how loss to follow-up was addressed<br><i>Case-control study</i> —If applicable, explain how matching of cases and controls was addressed<br><i>Cross-sectional study</i> —If applicable, describe analytical methods taking account of sampling strategy<br>(e) Describe any sensitivity analyses                                                                                                                                |

Continued on next page



1  
2  
3  
4  
5  
6  
7  
8  
9  
10  
11  
12  
13  
14  
15  
16  
17  
18  
19  
20  
21  
22  
23  
24  
25  
26  
27  
28  
29  
30  
31  
32  
33  
34  
35  
36  
37  
38  
39  
40  
41  
42  
43  
44  
45  
46  
47  
48  
49  
50  
51  
52  
53  
54  
55  
56  
57  
58  
59  
60**Results**

|                  |     |                                                                                                                                                                                                                                                                                                                                                                                                               |
|------------------|-----|---------------------------------------------------------------------------------------------------------------------------------------------------------------------------------------------------------------------------------------------------------------------------------------------------------------------------------------------------------------------------------------------------------------|
| Participants     | 13* | (a) Report numbers of individuals at each stage of study—eg numbers potentially eligible, examined for eligibility, confirmed eligible, included in the study, completing follow-up, and analysed<br>(b) Give reasons for non-participation at each stage<br>(c) Consider use of a flow diagram                                                                                                               |
| Descriptive data | 14* | (a) Give characteristics of study participants (eg demographic, clinical, social) and information on exposures and potential confounders<br>(b) Indicate number of participants with missing data for each variable of interest<br>(c) <i>Cohort study</i> —Summarise follow-up time (eg, average and total amount)                                                                                           |
| Outcome data     | 15* | <i>Cohort study</i> —Report numbers of outcome events or summary measures over time<br><i>Case-control study</i> —Report numbers in each exposure category, or summary measures of exposure<br><i>Cross-sectional study</i> —Report numbers of outcome events or summary measures                                                                                                                             |
| Main results     | 16  | (a) Give unadjusted estimates and, if applicable, confounder-adjusted estimates and their precision (eg, 95% confidence interval). Make clear which confounders were adjusted for and why they were included<br>(b) Report category boundaries when continuous variables were categorized<br>(c) If relevant, consider translating estimates of relative risk into absolute risk for a meaningful time period |
| Other analyses   | 17  | Report other analyses done—eg analyses of subgroups and interactions, and sensitivity analyses                                                                                                                                                                                                                                                                                                                |

**Discussion**

|                  |    |                                                                                                                                                                            |
|------------------|----|----------------------------------------------------------------------------------------------------------------------------------------------------------------------------|
| Key results      | 18 | Summarise key results with reference to study objectives                                                                                                                   |
| Limitations      | 19 | Discuss limitations of the study, taking into account sources of potential bias or imprecision. Discuss both direction and magnitude of any potential bias                 |
| Interpretation   | 20 | Give a cautious overall interpretation of results considering objectives, limitations, multiplicity of analyses, results from similar studies, and other relevant evidence |
| Generalisability | 21 | Discuss the generalisability (external validity) of the study results                                                                                                      |

**Other information**

|         |    |                                                                                                                                                               |
|---------|----|---------------------------------------------------------------------------------------------------------------------------------------------------------------|
| Funding | 22 | Give the source of funding and the role of the funders for the present study and, if applicable, for the original study on which the present article is based |
|---------|----|---------------------------------------------------------------------------------------------------------------------------------------------------------------|

\*Give information separately for cases and controls in case-control studies and, if applicable, for exposed and unexposed groups in cohort and cross-sectional studies.

**Note:** An Explanation and Elaboration article discusses each checklist item and gives methodological background and published examples of transparent reporting. The STROBE checklist is best used in conjunction with this article (freely available on the Web sites of PLoS Medicine at <http://www.plosmedicine.org/>, Annals of Internal Medicine at <http://www.annals.org/>, and Epidemiology at <http://www.epidem.com/>). Information on the STROBE Initiative is available at [www.strobe-statement.org](http://www.strobe-statement.org).

# BMJ Open

## Influence of socio-economic status on the referral process to cardiac rehabilitation following acute coronary syndrome: a cross-sectional study

|                                 |                                                                                                                                                                                                                                                                                                                                                                                                                                                                                                                                                                                                                                                                           |
|---------------------------------|---------------------------------------------------------------------------------------------------------------------------------------------------------------------------------------------------------------------------------------------------------------------------------------------------------------------------------------------------------------------------------------------------------------------------------------------------------------------------------------------------------------------------------------------------------------------------------------------------------------------------------------------------------------------------|
| Journal:                        | <i>BMJ Open</i>                                                                                                                                                                                                                                                                                                                                                                                                                                                                                                                                                                                                                                                           |
| Manuscript ID                   | bmjopen-2019-036088.R1                                                                                                                                                                                                                                                                                                                                                                                                                                                                                                                                                                                                                                                    |
| Article Type:                   | Original research                                                                                                                                                                                                                                                                                                                                                                                                                                                                                                                                                                                                                                                         |
| Date Submitted by the Author:   | 22-Jan-2020                                                                                                                                                                                                                                                                                                                                                                                                                                                                                                                                                                                                                                                               |
| Complete List of Authors:       | Graversen, Christina Boesgaard; Aalborg University Hospital, Department of Cardiology, Department of Clinical Medicine<br>Johansen, Martin; Aalborg University Hospital, Forsknings Hus<br>Eichhorst, Regina; Slagelse Hospital, Department of Cardiology<br>Johnsen, Søren Paaske; Aalborg University, Danish Center for Clinical Health Services Research, Department of Clinical Medicine<br>Riahi, Sam; Aalborg University Hospital, Department of Cardiology, Department of Clinical Medicine<br>Holmberg, Teresa; University of Southern Denmark, National Institute of Public Health<br>Larsen, Mogens Lytken; Aalborg University, Department of Clinical Medicine |
| <b>Primary Subject Heading</b>: | Cardiovascular medicine                                                                                                                                                                                                                                                                                                                                                                                                                                                                                                                                                                                                                                                   |
| Secondary Subject Heading:      | Rehabilitation medicine                                                                                                                                                                                                                                                                                                                                                                                                                                                                                                                                                                                                                                                   |
| Keywords:                       | Cardiac Epidemiology < CARDIOLOGY, Adult cardiology < CARDIOLOGY, Myocardial infarction < CARDIOLOGY                                                                                                                                                                                                                                                                                                                                                                                                                                                                                                                                                                      |
|                                 |                                                                                                                                                                                                                                                                                                                                                                                                                                                                                                                                                                                                                                                                           |

SCHOLARONE™  
Manuscripts

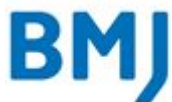

I, the Submitting Author has the right to grant and does grant on behalf of all authors of the Work (as defined in the below author licence), an exclusive licence and/or a non-exclusive licence for contributions from authors who are: i) UK Crown employees; ii) where BMJ has agreed a CC-BY licence shall apply, and/or iii) in accordance with the terms applicable for US Federal Government officers or employees acting as part of their official duties; on a worldwide, perpetual, irrevocable, royalty-free basis to BMJ Publishing Group Ltd ("BMJ") its licensees and where the relevant Journal is co-owned by BMJ to the co-owners of the Journal, to publish the Work in this journal and any other BMJ products and to exploit all rights, as set out in our [licence](#).

The Submitting Author accepts and understands that any supply made under these terms is made by BMJ to the Submitting Author unless you are acting as an employee on behalf of your employer or a postgraduate student of an affiliated institution which is paying any applicable article publishing charge ("APC") for Open Access articles. Where the Submitting Author wishes to make the Work available on an Open Access basis (and intends to pay the relevant APC), the terms of reuse of such Open Access shall be governed by a Creative Commons licence – details of these licences and which [Creative Commons](#) licence will apply to this Work are set out in our licence referred to above.

Other than as permitted in any relevant BMJ Author's Self Archiving Policies, I confirm this Work has not been accepted for publication elsewhere, is not being considered for publication elsewhere and does not duplicate material already published. I confirm all authors consent to publication of this Work and authorise the granting of this licence.

1  
2  
3  
4 1 **Title: Influence of socio-economic status on the referral process to cardiac**  
5  
6 2 **rehabilitation following acute coronary syndrome: a cross-sectional study**  
7  
8  
9

10 3 **Authors:**

11  
12 4 Christina Boesgaard Graversen<sup>a,b\*</sup>, Martin Berg Johansen<sup>c</sup>, Regina Eichhorst<sup>d</sup>, Søren Paaske  
13  
14 5 Johnsen<sup>e</sup>, Sam Riahi<sup>a,b</sup>, Teresa Holmberg<sup>f</sup>, Mogens Lytken Larsen<sup>b</sup>  
16

17 6 **Affiliations:**

- 18  
19 7 a. Department of Cardiology, Aalborg University Hospital, Aalborg, Denmark  
20  
21 8 b. Department of Clinical Medicine, Aalborg University, Aalborg, Denmark  
22  
23 9 c. Unit of Clinical Biostatistics, Aalborg University Hospital, Aalborg, Denmark  
24  
25 10 d. Department of Cardiology, Slagelse Hospital, Slagelse, Denmark  
26  
27 11 e. Danish Center for Clinical Health Services Research, Department of Clinical Medicine, Aalborg  
28  
29 12 University and Aalborg University Hospital, Aalborg, Denmark  
30  
31 13 f. National Institute of Public Health, University of Southern Denmark, Copenhagen, Denmark  
32  
33  
34

35 14 **Information about previous presentation of the whole or part of the work presented in the article:**

36  
37 15 Parts of the work has been presented in a poster format at the ESC Congress 2019.  
38  
39

40 16 **Sources of support, for all authors, for the work in the form of grants:**

41  
42 17 This work was supported by grants from the Karen Elise Jensen's Foundation and the Danish Heart  
43  
44 18 Foundation (18-R123-A8283-22081).  
45  
46

47 19 **Disclaimers, if any:**

48  
49 20 None  
50

51 21 **Corresponding author:**

52  
53 22 Christina Boesgaard Graversen, postal address: Holger Danskes Vej 73, 2nd Floor Left, 2000  
54  
55 23 Frederiksberg, DK, mail: [c.graversen@rn.dk](mailto:c.graversen@rn.dk)  
56

57 24 **Word count:** 3349 words  
58  
59  
60

## 25 Abstract

26 **Objective:** to evaluate the association between socio-economic status (SES) and referral to cardiac  
27 rehabilitation (CR) after incident acute coronary syndrome (ACS) by dividing the referral process into  
28 three phases (1. informed about CR, 2. willingness to participate in CR, and 3. assigned CR setting).

29 **Design:** Cross-sectional study.

30 **Setting:** Department of Cardiology at a Danish University Hospital from 1 January 2011 to 31 December  
31 2014.

32 **Participants:** A total of 1229 patients assessed for CR during hospitalisation with ACS were  
33 prospectively registered in the Rehab-North Register from 2011-2014. SES was assessed using data  
34 from national registers, concerning: personal income, occupational status, educational level, and civil  
35 status. Patients were excluded if in one of the following criteria were fulfilled: 1) missing data on SES, or  
36 2) acceptable reason for not informing patients about CR (treatment with coronary artery bypass graft,  
37 transfer to another hospital, still under treatment, or death).

38 **Main outcome measures:** Outcomes were defined by dividing the referral process into three phases: 1.  
39 informed about CR, 2. willingness to participate, and 3. assigned CR setting (in-hospital /community  
40 centre) after ACS.

41 **Results:** A total of 854 (69.5 %) patients were referred to CR. After adjustment for age, gender, ACS  
42 diagnosis (ST-Elevated Myocardial Infarction, Non-ST-Elevated Myocardial Infarction, Unstable Angina  
43 Pectoris) and comorbidity, high income had the strongest association of referral to CR in all three  
44 phases (informed about CR: OR 2.17, 95% CI: 1.0- 4.64; willingness to participate in CR: OR 1.55, 95% CI:  
45 1.02-2.35; assigned in-hospital CR: OR 1.47, 95% CI: 0.91-2.36). Educational level showed similar  
46 tendencies, however not statistically significant. The results did not vary according to gender.

1  
2  
3  
4 47 **Conclusion:** This is the first study to investigate the referral process to CR using a three-phase structure.

5  
6 48 It suggests income and education to influence all phases in the referral process to CR after ACS.

7  
8  
9 49 **Keywords:** Acute Myocardial Infarction, Cardiac Rehabilitation, Referral Process, Socio-economic Status

## 10 11 50 **Strengths and limitations of this study**

- 12  
13  
14 51 - This is the first study to investigate the referral process to cardiac rehabilitation (CR) using a  
15  
16 52 three phase structure (1. informed about CR, 2. willingness to participate in CR, and 3. assigned  
17  
18 53 CR setting) which provides better knowledge in understanding why social inequality persists in  
19  
20  
21 54 referral to CR.
- 22  
23 55 - Socio-economic variables were provided by highly validated Danish register data using the  
24  
25 56 unique 10-digit civil registration number that is given to all Danish citizens.
- 26  
27 57 - Multivariable logistic regression analyses were used to minimise potential confounding.
- 28  
29  
30 58 - Data was not gathered for specific scientific purposes and it cannot be ruled out that not all  
31  
32 59 patients admitted with Acute Coronary Syndrome were identified. However, such loss was  
33  
34  
35 60 considered unsystematic and unintended and should not pose a problem for bias introduction.

## 36 37 38 61 **Introduction**

39  
40  
41 62 Low socio-economic status (SES) is associated with higher risk of developing Ischemic Heart Disease  
42  
43 63 (IHD) and poorer subsequent outcome, including higher risk of recurrent cardiovascular events and  
44  
45 64 cardiac-related mortality.(1–5) Cardiac rehabilitation (CR) is an important step to reduce disease  
46  
47  
48 65 outcomes and is an integral part of IHD care as it aims to improve quality of life as well as patients'  
49  
50 66 physical, psychological, and social functioning.(4)

51  
52 67 CR comprises exercise therapy, psychological consulting, treatment-targeted therapy, and life-style  
53  
54 68 changing modules (dietary modification, and smoking cessation).(4) The program is a coordinated effort  
55  
56  
57 69 made by cardiologists, nurses, physiotherapists, dietitians, and eventually occupational therapists. If  
58  
59 70 needed, psychologists, social workers, or priests may be included as well.(4)

60

1  
2  
3  
4 71 The efficacy of CR in reducing cardiovascular mortality and risk of hospital readmissions is well-  
5  
6 72 documented.(6–8) It therefore seems irrational that international research in general continues to find  
7  
8 73 CR “referral” or “participation and completion” rates to be unsatisfactory.(9–13)  
9  
10 74 Different socio-economic characteristics (income, educational level, occupational status, civil status) are  
11  
12 75 shown to be associated with CR underutilization.(14) Low income and educational level have  
13  
14 76 irrespectively of type of health care system repeatedly been associated with limited participation and  
15  
16 77 completion rate.(11,15) It is consequently of major importance to eliminate the socio-economic  
17  
18 78 differences in CR if the inequality in IHD burden is to be reduced.  
19  
20 79 Obstacles in referral and participation to CR among patients with lower SES may be due to system-level  
21  
22 80 and personal barriers.(16) System-level barriers covers physicians recommendations, the interaction  
23  
24 81 with the healthcare team, and misconceptions about CR. Personal barriers includes perception about  
25  
26 82 IHD and CR, and belief about the ability to control IHD. (16) However, vulnerable elements in the  
27  
28 83 referral process prone to socio-economic inequality among patients with ACS remain unexplored. By  
29  
30 84 dividing the referral process into three phases, it is possible to evaluate if such inequality is the result of  
31  
32 85 selection of patients at the system-level (the process of informing patients about CR and the setting of  
33  
34 86 CR that patients are referred to) rather than the person-level (patients’ own willingness to participate in  
35  
36 87 CR). To our knowledge, no study has analysed the entire referral process using such three-phase  
37  
38 88 structure while controlling for confounders in a population of patients surviving ACS. Therefore, the  
39  
40 89 objective of this study was to investigate how SES is associated with the patients’ chances of 1) being  
41  
42 90 informed about CR, 2) willingness to participate, and 3) assigned CR setting (in-hospital or community  
43  
44 91 centre). Phase 3 was determined by regional guidelines: patients suffering ST-Elevated Myocardial  
45  
46 92 Infarction (STEMI) or complicated Non-ST-Elevated Myocardial Infarction (NSTEMI) were offered in-  
47  
48 93 hospital CR whereas patients with uncomplicated NSTEMI and Unstable Angina Pectoris (UAP) were  
49  
50 94 offered CR in a community centre).  
51  
52  
53  
54  
55  
56  
57  
58  
59  
60

## 96 **Methods**

97 The study followed the STROBE guidelines for cross-sectional studies.(17)

### 98 **Study design**

99 This population-based study used data from the Rehab-North Register. Its content has previously been  
100 described.(18) In short, the Rehab-North Register holds data on all patients hospitalised at the  
101 Department of Cardiology, Aalborg University Hospital from 1 January 2011 to 31 December 2014 with  
102 a diagnosis of ACS. All were assessed for eligibility to CR using a questionnaire.(18)

103 In Denmark, CR fully or partially takes place in-hospital or at community centres. In-hospital CR is  
104 reserved for high-risk patients and is structured with a more complex intervention. The Danish Public  
105 Health System is tax paid, enabling CR to be free of charge for the patient.

### 106 **Patient and Public involvement statement**

107 No patients were involved in the design, or conduct, or reporting, or dissemination plans of our  
108 research.

### 109 **Study Population**

110 The study population was identified in the Rehab-North Register as patients diagnosed with ACS (ICD-  
111 10: I20.0, I21.). The registered diagnosis was verified by linking data from the Rehab-North Register  
112 with the Danish National Patient Register (NPR) and the Danish Register of Causes of Death.(19) If any  
113 discrepancy arose, the diagnosis registered in the NPR was selected. Patients were excluded if in one of  
114 the following criteria were fulfilled: 1) missing data on SES 2) acceptable reason for not informing  
115 patients about CR, including treatment with coronary artery bypass graft, transfer to another hospital,  
116 still under treatment, or death. Patients who underwent coronary artery bypass grafting was informed  
117 about CR at the Thoracic Surgery Department performing the operation. Patients who were 'transferred



1  
2  
3  
4 118 to another hospital' received information about CR at other cardiology departments. We were not able  
5  
6 119 to receive confirmation regarding referral to CR in this patient group.

7  
8 120 The study population and referral design using three phases is illustrated in figure 1.

9  
10 121 **Socio-economic status**

11  
12 122 Different indicators of SES (personal income, occupational status, educational level, and civil status)  
13  
14 123 were chosen, due to a priori knowledge about their proposed mechanisms associated to the outcome  
15  
16 124 variable. Ascertainment of socio-economic variables from national registers was done by linkage of a  
17  
18 125 unique personal number given to all Danish residents.

19  
20 126 The Income Statistics Register provided information regarding both disposable personal income (low,  
21  
22 127 medium, high) calculated for the calendar year before disease onset, and occupational status  
23  
24 128 (employed, unemployed/out of workforce) set for the calendar year before disease onset.(20) A  
25  
26 129 person's highest obtained educational level (low, medium, high) was based on the International  
27  
28 130 Standard Classification of Education (ISCED)(21) from the Student's Register(22), and civil status  
29  
30 131 (married/partnership, divorced/unmarried /widow) from the Civil Registration System (CRS).(23)

31  
32  
33  
34  
35 132 **Outcomes**

36  
37 133 Outcomes were defined by dividing the referral process into three phases: 1. informed about CR, 2.  
38  
39 134 willingness to participate, and 3. assigned CR setting (in-hospital /community centre) after ACS.  
40  
41 135 All outcome information gathering were done during the patients' hospitalisation and included in the  
42  
43 136 questionnaires that founded the Rehab-North Register.

44  
45  
46  
47 137 **Covariates**

48  
49 138 The selection of covariates to be included in the multivariable analyses was done based on directed  
50  
51 139 acyclic graph (not shown).  
52  
53 140 Age was registered at time of diagnosis and categorized into three groups: < 65 years, 65-74 years, and  
54  
55 141 ≥ 75 years. Information regarding age and gender was gathered from the CRS.(23) Comorbidity  
56  
57  
58  
59  
60

1  
2  
3  
4 142 diagnoses were defined by the Charlson Comorbidity Index (CCI), but only diagnoses from the year 2011  
5  
6 143 until hospitalisation were accessible. Comorbidity diagnoses was drawn from the NPR.(24) In general,  
7  
8 144 patients with NSTEMI and UAP are less likely referred to CR compared to patients with STEMI.(25)  
9  
10 145 Therefore, to get an accurate estimate of the impacts of patients' SES on CR referral, ACS diagnosis  
11  
12 146 (STEMI, NSTEMI, UAP) were included as a covariate.(25)  
13  
14  
15 147

## 17 148 **Statistical analysis**

19 149 Baseline characteristics of study population were summarised by frequencies and percentages. The  
20  
21  
22 150 association between socio-economic variables and being informed about CR, willingness to participate,  
23  
24 151 and assigned CR setting was assessed by crude (model 1) and multivariable logistic regression adjusted  
25  
26 152 for confounders (age, gender, ACS diagnosis, CCI) (model 2). Results were presented in odds ratios (OR)  
27  
28 153 with 95% confidence intervals (95% CI). Potential effect modification by gender was assessed by  
29  
30 154 stratification and likelihood-ratio tests as studies have found females to experience lower rates of  
31  
32 155 referral to CR compared to males.(10,26) Statistical analyses were performed using Stata Software  
33  
34  
35 156 (v.15.1; Stata Corp. College Station, TX).  
36  
37

## 38 157 **Results**

39  
40  
41 158 Of the original cohort of 1822 patients diagnosed with ACS, only patients with no missing socio-  
42  
43 159 economic variables, and no acceptable reasons for not being informed about CR were included in the  
44  
45 160 study (figure 1). This resulted in a study population comprising 1229 patients (73.8% male). The  
46  
47 161 patients' baseline characteristics, stratified by diagnosis, are presented in table 1. STEMI patients were  
48  
49 162 relatively younger and still an available workforce with higher income. In the study population, 1123  
50  
51 163 (91.4%) patients were informed about CR of which 854 (76.0%) patients subsequently agreed to  
52  
53 164 participate in the program. Of those, 349 (40.9%) patients were referred to CR in a community centre  
54  
55 165 and 505 (59.1%) patients were referred to in-hospital CR (figure 1).  
56  
57  
58  
59  
60

166

**Table 1:** Characteristics of study population stratified by diagnosis

|                             | Full population | STEMI      | NSTEMI     | UAP        |
|-----------------------------|-----------------|------------|------------|------------|
| Characteristics             | n = 1229        | n = 402    | n = 711    | n = 116    |
| Male (n, %)                 | 907 (73.8)      | 322 (80.1) | 503 (70.7) | 82 (70.7)  |
| Age Group (years)           |                 |            |            |            |
| < 65                        | 591 (48.1)      | 227 (56.5) | 308 (43.3) | 56 (48.3)  |
| 65-74                       | 371 (30.2)      | 116 (28.9) | 215 (30.2) | 40 (34.5)  |
| ≥ 75                        | 267 (21.7)      | 59 (14.7)  | 188 (26.4) | 20 (17.2)  |
| Civil status (n, %)         |                 |            |            |            |
| Married/Partnership         | 793 (64.5)      | 253 (62.9) | 449 (63.2) | 91 (78.4)  |
| Divorced/Unmarried/Widow    | 436 (35.5)      | 149 (37.1) | 262 (36.8) | 25 (21.6)  |
| Occupational status (n, %)  |                 |            |            |            |
| Employed                    | 479 (39.0)      | 195 (48.5) | 240 (33.8) | 44 (37.9)  |
| Unemployed/out of workforce | 750 (61.0)      | 207 (51.5) | 471 (66.2) | 72 (62.1)  |
| Educational level (n, %)    |                 |            |            |            |
| Low                         | 516 (42.0)      | 144 (35.8) | 322 (45.3) | 50 (43.1)  |
| Medium                      | 539 (43.9)      | 201 (50.0) | 293 (41.2) | 45 (38.8)  |
| High                        | 174 (14.2)      | 57 (14.2)  | 96 (13.5)  | 21 (18.1)  |
| Income, tertile (n, %)      |                 |            |            |            |
| Low                         | 405 (33.0)      | 113 (28.1) | 251 (35.3) | 41 (35.3)  |
| Medium                      | 406 (33.0)      | 124 (30.8) | 247 (34.7) | 35 (30.2)  |
| High                        | 418 (34.0)      | 165 (41.0) | 213 (30.0) | 40 (34.5)  |
| Charlson Comorbidity Index  |                 |            |            |            |
| Low (0 points)              | 1088 (88.5)     | 358 (89.1) | 630 (88.6) | 100 (86.2) |
| Moderate/High (>0 points)   | 141 (11.5)      | 44 (10.9)  | 81 (11.4)  | 16 (13.8)  |

167 STEMI: ST-elevated myocardial infarction; NSTEMI: non-ST-elevated myocardial infarction; UAP: unstable angina

168 pectoris

1  
2  
3  
4 169 **Phase 1: SES and being informed about CR**

5  
6 170 Higher income and educational level had positive crude associations with being informed about CR  
7  
8 171 whereas being unemployed/retired or single-living had a negative association (table 2). These  
9  
10 172 associations were greatly reduced after adjustment for age, gender, ACS diagnosis, and CCI. The  
11  
12 173 adjusted regression analysis found high income to be associated with being informed about CR (OR  
13  
14 174 2.17, 95% CI: 1.01; 4.64). High educational level was also associated with being informed about CR  
15  
16 175 although the association did not reach statistical significance (OR: 1.60, 95% CI: 0.72-3.54).  
17  
18  
19

20 **Table 2:** Logistic regression model for being informed about cardiac rehabilitation, n = 1229

|                             | n, (%)      | Unadjusted |            | Multivariable adjusted* |           |
|-----------------------------|-------------|------------|------------|-------------------------|-----------|
|                             |             | OR         | 95% CI     | OR                      | 95% CI    |
| Observations                | 1123 (91.4) |            |            |                         |           |
| Civil status                |             |            |            |                         |           |
| Married/Partnership         | 469 (38.2)  | 1 (ref.)   |            | 1 (ref.)                |           |
| Divorced/Unmarried/Widow    | 654 (53.2)  | 0.64       | 0.43-0.95  | 0.76                    | 0.49-1.19 |
| Occupational status         |             |            |            |                         |           |
| Employed                    | 735 (59.8)  | 1 (ref.)   |            | 1 (ref.)                |           |
| Unemployed/out of workforce | 388 (31.6)  | 0.15       | 0.07-0.28  | 0.46                    | 0.20-1.07 |
| Educational level           |             |            |            |                         |           |
| Low                         | 452 (36.8)  | 1 (ref.)   |            | 1 (ref.)                |           |
| Medium                      | 505 (41.1)  | 2.10       | 1.36-3.25  | 1.17                    | 0.72-1.89 |
| High                        | 166 (13.5)  | 2.94       | 1.38-6.26  | 1.60                    | 0.72-3.54 |
| Income, tertiles            |             |            |            |                         |           |
| Low                         | 342 (27.8)  | 1 (ref.)   |            | 1 (ref.)                |           |
| Medium                      | 374 (30.4)  | 2.15       | 1.37-3.38  | 1.40                    | 0.86-2.28 |
| High                        | 407 (33.1)  | 6.82       | 3.54-13.14 | 2.17                    | 1.01-4.64 |

21  
22  
23  
24  
25  
26  
27  
28  
29  
30  
31  
32  
33  
34  
35  
36  
37  
38  
39  
40  
41  
42  
43  
44  
45  
46  
47  
48  
49  
50  
51  
52  
53  
54  
55  
56 \* Adjusted for age, gender, ACS diagnosis, Charlson Comorbidity Index. OR: odds ratio; CI: confidence  
57 interval  
58  
59  
60

176

1  
2  
3  
4 **177 Phase 2: SES and willingness to participate in CR**

5  
6 **178** High income, high educational level, and being single-living (divorced/unmarried/widow) were all  
7  
8 **179** associated with a higher likelihood of willingness to participate in CR in the crude analyses (table 3).  
9  
10 **180** Being unemployed/retired was negatively associated with being willing to participate in CR. After  
11  
12 **181** adjustment, high income level had the highest OR (OR 1.55, 95% CI: 1.02; 2.35) in relation to willingness  
13  
14 **182** to participate. A similar pattern was observed for high educational level although the association was  
15  
16 **183** not statistically significant (OR 1.60, 95% CI: 0.78; 1.88). Likewise, being single-living was also associated  
17  
18 **184** with willingness to participate in CR, although, the estimates did not reach statistical significance (OR  
19  
20 **185** 1.28, 95% CI: 0.93; 1.76).  
21  
22  
23

24 **Table 3:** Logistic regression model for willingness to participate in cardiac rehabilitation, n = 1123

|                             | n (%)      | Unadjusted |           | Multivariable adjusted* |           |
|-----------------------------|------------|------------|-----------|-------------------------|-----------|
|                             |            | OR         | 95% CI    | OR                      | 95% CI    |
| Observations                | 854 (76.0) |            |           |                         |           |
| Civil status                |            |            |           |                         |           |
| Married/Partnership         | 388 (34.6) | 1 (ref.)   |           | 1 (ref.)                |           |
| Divorced/Unmarried/Widow    | 466 (41.5) | 1.33       | 0.99-1.79 | 1.28                    | 0.93-1.76 |
| Occupational status         |            |            |           |                         |           |
| Employed                    | 546 (48.6) | 1 (ref.)   |           | 1 (ref.)                |           |
| Unemployed/out of workforce | 308 (27.4) | 0.52       | 0.39-0.69 | 0.93                    | 0.62-1.40 |
| Educational level           |            |            |           |                         |           |
| Low                         | 322 (28.7) | 1 (ref.)   |           | 1 (ref.)                |           |
| Medium                      | 405 (36.1) | 1.64       | 1.21-2.20 | 1.36                    | 0.98-1.88 |
| High                        | 127 (11.3) | 1.31       | 0.87-1.99 | 1.21                    | 0.78-1.88 |
| Income, tertiles            |            |            |           |                         |           |
| Low                         | 229 (20.4) | 1 (ref.)   |           | 1 (ref.)                |           |

|        |            |      |           |      |           |
|--------|------------|------|-----------|------|-----------|
| Medium | 288 (25.6) | 1.65 | 1.19-2.30 | 1.35 | 0.94-1.94 |
| High   | 337 (30.0) | 2.38 | 1.69-3.34 | 1.55 | 1.02-2.35 |

\* Adjusted for age, gender, ACS diagnosis, Charlson Comorbidity Index. OR: odds ratio; CI: confidence interval

186

### 187 Phase 3: SES and assigned CR setting

188 Table 4 shows the association of SES on being assigned to in-hospital CR compared to CR in a

189 community centre. High income was significantly associated with assignment to in-hospital CR (OR:

190 2.10, 95% CI: 1.49; 2.97) but the association was attenuated after adjustment for confounders (income:

191 adjusted OR: 1.47, 95% CI: 0.91; 2.36).

**Table 4:** Logistic regression model for assigned cardiac rehabilitation setting, n = 854

|                             | n (%)      | Unadjusted |           | Multivariable adjusted* |           |
|-----------------------------|------------|------------|-----------|-------------------------|-----------|
|                             |            | OR         | 95% CI    | OR                      | 95% CI    |
| Observations                | 505 (59.1) |            |           |                         |           |
| Civil status                |            |            |           |                         |           |
| Married/Partnership         | 268 (31.4) | 1 (ref.)   |           | 1 (ref.)                |           |
| Divorced/Unmarried/Widow    | 237 (27.8) | 1.13       | 0.85-1.51 | 1.20                    | 0.84-1.69 |
| Occupational status         |            |            |           |                         |           |
| Employed                    | 317 (37.1) | 1 (ref.)   |           | 1 (ref.)                |           |
| Unemployed/out of workforce | 188 (22.0) | 0.46       | 0.35-0.61 | 0.75                    | 0.49-1.15 |
| Educational level           |            |            |           |                         |           |
| Low                         | 177 (20.7) | 1 (ref.)   |           | 1 (ref.)                |           |
| Medium                      | 248 (29.0) | 1.29       | 0.96-1.74 | 0.90                    | 0.63-1.30 |
| High                        | 80 (9.4)   | 1.39       | 0.91-2.13 | 1.20                    | 0.72-1.99 |
| Income, tertiles            |            |            |           |                         |           |
| Low                         | 115 (13.5) | 1 (ref.)   |           | 1 (ref.)                |           |
| Medium                      | 161 (18.9) | 1.26       | 0.89-1.78 | 1.14                    | 0.73-1.78 |

1  
2  
3  
4 High 229 (26.8) 2.10 1.49-2.97 1.47 0.91-2.36

5  
6 \* Adjusted for age, gender, ACS diagnosis, Charlson Comorbidity Index. OR: odds ratio; CI:  
7 confidence interval

## 8 9 192 **Supplementary analyses**

10  
11 193 The analyses were stratified by gender in a supplementary analysis. The results were not substantially  
12  
13 194 different from the main analysis (not shown).

14  
15 195 The baseline characteristics of patients being excluded from the study population was obtained (online  
16  
17 196 supplementary material, table 1). After multivariable logistic regression, patients being excluded from  
18  
19 197 the study population to have significantly lower SES compared to the patients being included (online  
20  
21 198 supplementary material, table 2).

## 22 23 24 25 199 **Discussion**

26  
27 200 In this study, the referral process to CR was assessed using a three-phase structure: 1. informed about  
28  
29 201 CR, 2. willingness to participate in CR, and 3. assigned CR setting. After adjustment, high income was  
30  
31 202 the only variable statistical significantly associated with referral to CR in phase 1 and 2, and  
32  
33 203 insignificantly associated with phase 3 of the referral process. High educational level had a similar  
34  
35 204 pattern, but the association did not reach statistical significance.

36  
37 205 Overall, 69.5% of the patients were referred to CR, which is in accordance with earlier findings (22-  
38  
39 206 81.5%).(9,10,25,26) Notably, in one study strikingly 86% was referred to CR after usage of a social  
40  
41 207 differentiated intervention program.(27) However, it would be difficult to reproduce such a result in an  
42  
43 208 observational study without this specific purpose.

44  
45 209 The finding of patients' income and educational level to be associated with all three phases the referral  
46  
47 210 process to CR may be explained by 'the Nordic Paradox' observed in the Nordic European  
48  
49 211 countries.(28,29) These countries, covering Denmark, Norway, Sweden, and Finland, are 'welfare  
50  
51 212 states' with equal access to health care which theoretically ought to diminish the importance of  
52  
53 213 patients' level of income and education regarding access to health care services. However, this is not  
54  
55  
56  
57  
58  
59  
60

1  
2  
3  
4 214 the case as inequality e.g. in mortality, persists.(29) Although income inequality is smaller in the Nordic  
5  
6 215 countries, this still covers over inequality in wealth, housing condition, and material living conditions,  
7  
8 216 and are used together with educational level to assess latent socio-economic factors (health literacy,  
9  
10 217 greater burden of behavioral and biological risk factors, and reduced access to quality care and  
11  
12 218 medication).(30) Thus, our finding may imply such latent socio-economic factors to be important in the  
13  
14  
15 219 referral process to CR.

16  
17 220 We found single-living to be potentially associated with the willingness to participate in CR. If such an  
18  
19 221 association is reproducible in later studies, then attention should focus on these patients without a  
20  
21 222 partner, who less often receive referral to CR, which has been attributed to lack of social support.(31)

22  
23  
24  
25 223 International studies find younger age, male gender, living with a partner, high educational level, and  
26  
27 224 high gross income to be predictors of CR referral.(10,25,31) This inequality in CR referral causes concern  
28  
29 225 as participation helps patients implement needed behavioural changes, which reduces cardiac-related  
30  
31 226 deaths.(6) Patients with low SES often have biological, behavioural, and psychosocial disadvantages  
32  
33 227 that may accelerate risk of cardiovascular diseases. Therefore, the need of referral, attendance, and  
34  
35 228 completion of CR should be prioritized in this patient group.(1,2)

36  
37  
38 229 By splitting the referral process into three phases, new insights regarding importance of taking patients  
39  
40 230 SES into consideration when referring them to CR was gained. Our results show the importance of being  
41  
42 231 aware of system-level barriers present in the referral process. Moreover, identifying those patients who  
43  
44 232 need more motivation before being willing to enter a CR programme is highly important. In that way,  
45  
46 233 patients are well-informed about CR and able to make a well-considered decision regarding  
47  
48 234 participation.

49  
50  
51  
52 235 Definition of SES is a conceptual challenge often solved by use of personal/family income, educational  
53  
54 236 level, civil status, and/or occupation. There is no consensus on which parameters to use as indicators of  
55  
56 237 SES. It has been argued to use single variables as proxy measurements for SES despite different causal  
57  
58  
59  
60



1  
2  
3  
4 238 pathways. However, others find it problematic only to estimate SES by one parameter, as this may  
5  
6 239 increase the risk of residual confounding by unmeasured socio-economic circumstances.(1,32)  
7  
8 240 Moreover, the effect of socio-economic variables seems rather outcome-related and is suggested not to  
9  
10 241 be used interchangeably without thorough consideration.(33) As our central interest was to investigate  
11  
12 242 the impact of SES on the referral process to CR, and therefore use SES as exposure variable, we a priori  
13  
14 243 hypothesized the different variables all to be linked to our outcome measures. The risk of such an  
15  
16 244 approach was the introduction of collinearity. However, research finds e.g. educational level,  
17  
18 245 occupation, and income to measure different phenomena, to have different causal mechanisms, and in  
19  
20 246 part to be explained by other socio-economic parameters.(33,34) Since literature finds income,  
21  
22 247 educational level, occupational status, and civil status to be important determinants for referral,  
23  
24 248 participation, and completion of CR, it seemed most appropriate to include all variables in order to  
25  
26 249 answer our research questions. The consequence of this approach was that we cannot get a single  
27  
28 250 estimate that illustrates the effect of SES.  
29  
30  
31  
32  
33 251 Some caution must be taken when interpreting the results of our study. Firstly, data was not gathered  
34  
35 252 for specific scientific purposes and it cannot be ruled out that some patients admitted with ACS were  
36  
37 253 not included in the Rehab-North Register. However, such loss was considered unsystematic and  
38  
39 254 unintended and should not pose a problem for bias introduction. Moreover, the non-response analysis  
40  
41 255 found excluded patients to have lower SES compared to the included study population. As exclusion  
42  
43 256 was due to clinical implications (patients were to receive CR referral elsewhere), this should not pose a  
44  
45 257 problem for participation bias introduction in our study population.  
46  
47  
48 258 Secondly, use of register data minimized risk of information bias, due to nationwide good algorithms for  
49  
50 259 correct diagnosis coding. Despite linkage to other registers, risk of residual or unmeasured confounding  
51  
52 260 may be present.(35) Thirdly, there may be a risk of residual or unaccounted confounding, if data on  
53  
54 261 confounding variables was not classified with adequate precision. The CCI variable may be inaccurate  
55  
56  
57  
58  
59  
60

1  
2  
3  
4 262 which is caused by the limited time-frame for inclusion of comorbidities. This increases the risk of  
5  
6 263 unaccounted confounding and should be taken into consideration when interpreting the results.  
7  
8 264 Participation and completion rates of in-hospital CR and CR in community centres remained unexplored  
9  
10 265 as our study only focused on the referral process to CR.  
11

## 12 266 **Conclusion**

13  
14  
15 267 High income and educational level were associated with a larger chance of being informed about CR,  
16  
17 268 willingness to participate in CR, and assigned in-hospital CR in patients with ACS.  
18  
19  
20

21 269

22  
23  
24 270 **Acknowledgements:** None

25  
26 271 **Contributorship statement:** CBG, RE, and MLL contributed to study design and acquisition  
27  
28  
29 272 of the data. CBG, MNJ, and MLL analysed and interpreted the data. SPJ, SR, and THO contributed to  
30  
31 273 interpretation. CBG drafted the initial manuscript and all authors critically revised the manuscript and  
32  
33 274 gave final approval.  
34  
35

36 275 **Ethics:** The study is approved by the Danish Data Protection Agency (project number: 2008-58-0028)  
37  
38  
39 276 and the Danish Patient Safety Authority (3-3013-2763/1). In Denmark, no written consent is needed for  
40  
41 277 use of such register-based data.  
42  
43

44 278 **Funding:** This work was supported by the Karen Elise Jensen's Foundation, and the Danish Heart  
45  
46  
47 279 Foundation grant number: 18-R123-A8283-22081. The funders had no role in planning or conducting  
48  
49 280 the study.  
50

51  
52 281 **Competing interest:** None declared  
53

54  
55 282 **Data sharing statement:** No additional data available  
56  
57

58 283  
59  
60

## References

1. Havranek EP, Mujahid MS, Barr DA, Blair I V., Cohen MS, Cruz-Flores S, et al. Social determinants of risk and outcomes for cardiovascular disease: A scientific statement from the American Heart Association. *Circulation*. 2015;132(9):873–98.
2. Schultz WM, Kelli HM, Lisko JC, Varghese T, Shen J, Sandesara P, et al. Socioeconomic Status and Cardiovascular Outcomes. *Circulation*. 2018;137(20):2166–78.
3. Ohm J, Skoglund PH, Discacciati A, Sundström J, Hambraeus K, Jernberg T, et al. Socioeconomic status predicts second cardiovascular event in 29,226 survivors of a first myocardial infarction. *Eur J Prev Cardiol*. 2018;25(9):985–93.
4. Piepoli MF, Corra U, Adamopoulos S, Benzer W, Bjarnason-wehrens B, Cupples M, et al. Secondary prevention in the clinical management of patients with cardiovascular diseases . Core components , standards and outcome measures for referral and delivery. *Eur J Prev Cardiol*. 2014;21(6):664–81.
5. Rasmussen JN, Rasmussen S, Gislason GH, Buch P, Abildstrom SZ, Køber L, et al. Mortality after acute myocardial infarction according to income and education. *J Epidemiol Community Health*. 2006;60(4):351–6.
6. Anderson L, Oldridge N, Thompson DR, Zwisler A-D, Rees K, Martin N, et al. Exercise-Based Cardiac Rehabilitation for Coronary Heart Disease. *J Am Coll Cardiol*. 2016;67(1):1–12.
7. Anderson LJ, Taylor RS. Cardiac rehabilitation for people with heart disease: An overview of Cochrane systematic reviews. *Int J Cardiol*. 2014;177(2):348–61.
8. Rauch B, Davos CH, Doherty P, Saure D, Metzendorf MI, Salzwedel A, et al. The prognostic effect of cardiac rehabilitation in the era of acute revascularisation and statin therapy: A systematic review and meta-analysis of randomized and non-randomized studies - The Cardiac

- 1  
2  
3  
4 307           Rehabilitation Outcome Study (CROS). *Eur J Prev Cardiol.* 2016;23(18):1914–39.  
5  
6 308    9.       Sumner J, Grace SL, Doherty P. Predictors of Cardiac Rehabilitation Utilization in England :  
7  
8 309           Results From the National Audit. *J Am Heart Assoc.* 2016;5:1–8.  
9  
10  
11 310    10.      Colella TJ, Gravely S, Marzolini S, Grace SL, Francis JA, Oh P, et al. Sex bias in referral of women  
12  
13 311           to outpatient cardiac rehabilitation? A meta-analysis. *Eur J Prev Cardiol.* 2015;22(4):423–41.  
14  
15  
16 312    11.      Martin B-J, Hauer T, Arena R, Austford LD, Galbraith PD, Lewin a. M, et al. Cardiac Rehabilitation  
17  
18 313           Attendance and Outcomes in Coronary Artery Disease Patients. *Circulation.* 2012;126(6):677–87.  
19  
20  
21 314    12.      Piepoli MF, Hoes AW, Agewall S, Albus C, Brotons C, Catapano AL, et al. 2016 European  
22  
23 315           Guidelines on cardiovascular disease prevention in clinical practice. *Eur Heart J.*  
24  
25 316           2016;37(29):2315–81.  
26  
27  
28 317    13.      Smith SC, Benjamin EJ, Bonow RO, Braun LT, Creager MA, Franklin BA, et al. AHA/ACCF  
29  
30 318           secondary prevention and risk reduction therapy for patients with coronary and other  
31  
32 319           atherosclerotic vascular disease: 2011 update: A guideline from the American Heart Association  
33  
34 320           and American College of Cardiology Foundation. *Circulation.* 2011;124(22):2458–73.  
35  
36  
37 321    14.      Gaalema DE, Elliott RJ, Morford ZH, Higgins ST, Ades PA. Effect of Socioeconomic Status on  
38  
39 322           Propensity to Change Risk Behaviors Following Myocardial Infarction : Implications for Healthy  
40  
41 323           Lifestyle Medicine. *Prog Cardiovasc Dis.* 2017;60(1):159–68.  
42  
43  
44 324    15.      Nielsen KM, Faergeman O, Foldspang A, Larsen ML. Cardiac rehabilitation: Health characteristics  
45  
46 325           and socio-economic status among those who do not attend. *Eur J Public Health.* 2008;18(5):479–  
47  
48 326           83.  
49  
50  
51 327    16.      Neubeck L, Freedman S Ben, Clark AM, Briffa T, Bauman A, Redfern J. Participating in cardiac  
52  
53 328           rehabilitation: A systematic review and meta-synthesis of qualitative data. *Eur J Prev Cardiol.*  
54  
55 329           2012;19(3):494–503.  
56  
57  
58  
59  
60

- 1  
2  
3  
4 330 17. von Elm E, Altman DG, Egger M, Pocock SJ, Gøtzsche PC, Vandenbroucke JP. The Strengthening  
5  
6 331 the Reporting of Observational Studies in Epidemiology (STROBE) statement: guidelines for  
7  
8 332 reporting observational studies. *J Clin Epidemiol*. 2008;61(4):344–9.  
9  
10  
11 333 18. Graversen CB, Eichhorst R, Ravn L, Christiansen SR, Johansen MB, Larsen ML, et al. Social  
12  
13 334 inequality and barriers to cardiac rehabilitation in the rehab-North register. *Scand Cardiovasc J*.  
14  
15 335 2017;51(6):316–22.  
16  
17  
18 336 19. Madsen M, Davidsen M, Rasmussen S, Abildstrom SZ, Osler M. The validity of the diagnosis of  
19  
20 337 acute myocardial infarction in routine statistics: A comparison of mortality and hospital  
21  
22 338 discharge data with the Danish MONICA registry. *J Clin Epidemiol*. 2003;56(2):124–30.  
23  
24  
25 339 20. Baadsgaard M, Quitzau J. Danish registers on personal income and transfer payments. *Scand J*  
26  
27 340 *Public Health*. 2011;39(7):103–5.  
28  
29  
30 341 21. Eurostat Statistics Explained. International Standard Classification of Education (ISCED)  
31  
32 342 [Internet]. Available from: [https://ec.europa.eu/eurostat/statistics-](https://ec.europa.eu/eurostat/statistics-explained/index.php/International_Standard_Classification_of_Education_%28ISCED%29)  
33  
34 343 [explained/index.php/International\\_Standard\\_Classification\\_of\\_Education\\_%28ISCED%29](https://ec.europa.eu/eurostat/statistics-explained/index.php/International_Standard_Classification_of_Education_%28ISCED%29)  
35  
36  
37 344 22. Jensen VM, Rasmussen a. W. Danish education registers. *Scand J Public Health*. 2011;39(7  
38  
39 345 Suppl):91–4.  
40  
41  
42 346 23. Pedersen CB. The Danish Civil Registration System. *Scand J Public Health*. 2011;39(7 suppl):22–5.  
43  
44  
45 347 24. Thygesen SK, Christiansen CF, Lash TL, Christensen S, Sorensen HT. Predictive value of coding of  
46  
47 348 diagnoses in the charlson comorbidity index in the Danish national registry of patients.  
48  
49 349 *Pharmacoepidemiol Drug Saf*. 2009;18 (S1):S189.  
50  
51  
52 350 25. Brown TM, Hernandez AF, Bittner V, Cannon CP, Ellrodt G, Liang L, et al. Predictors of Cardiac  
53  
54 351 Rehabilitation Referral in Coronary Artery Disease Patients. Findings From the American Heart  
55  
56 352 Association’s Get With The Guidelines Program. *J Am Coll Cardiol*. 2009;54(6):515–21.  
57  
58  
59  
60

- 1  
2  
3  
4 353 26. Colbert JD, Martin B-J, Haykowsky MJ, Hauer TL, Austford LD, Arena RA, et al. Cardiac  
5  
6 354 rehabilitation referral, attendance and mortality in women. *Eur J Prev Cardiol.* 2014;22(8):979–  
7  
8 355 86.  
9  
10  
11 356 27. Meillier LK, Nielsen KM, Larsen FB, Larsen ML. Socially differentiated cardiac rehabilitation: Can  
12  
13 357 we improve referral, attendance and adherence among patients with first myocardial infarction?  
14  
15 358 *Scand J Public Health.* 2012;40(3):286–93.  
16  
17  
18 359 28. Mackenbach JP. The persistence of social inequalities in modern welfare states: the explanation  
19  
20 360 of a paradox. *Soc Sci Med.* 2012;75:761–9.  
21  
22  
23 361 29. Mackenbach JP. Nordic paradox, Southern miracle, Eastern disaster: Persistence of inequalities  
24  
25 362 in mortality in Europe. *Eur J Public Health.* 2017;27:14–7.  
26  
27  
28 363 30. Tromp J, Collins S. Universal healthcare but not universal access? *Eur J Prev Cardiol.*  
29  
30 364 2019;27(1);75-8.s  
31  
32  
33 365 31. Cortés O, Arthur HM. Determinants of referral to cardiac rehabilitation programs in patients  
34  
35 366 with coronary artery disease: A systematic review. *Am Heart J.* 2006;151(2):249–56.  
36  
37  
38 367 32. Galobardes B, Shaw M, Lawlor DA, Lynch JW, Smith GD. Indicators of socioeconomic position  
39  
40 368 (part 1). *J Epidemiol Community Health.* 2006;60(1):7–12.  
41  
42  
43 369 33. Geyer S, Hemström Ö, Peter R, Vågerö D. Education, income, and occupational class cannot be  
44  
45 370 used interchangeably in social epidemiology. Empirical evidence against a common practice. *J*  
46  
47 371 *Epidemiol Community Health.* 2006;60(9):804–10.  
48  
49  
50  
51 372 34. Lahelma E, Martikainen P, Laaksonen M, Aittomäki A. Pathways between socioeconomic  
52  
53 373 determinants of health. *J Epidemiol Community Health.* 2004;58(4):327–32.  
54  
55  
56 374 35. Schmidt M, Schmidt SAJ, Sandegaard JL, Ehrenstein V, Pedersen L, Sørensen HT. The Danish  
57  
58 375 National patient registry: A review of content, data quality, and research potential. *Clin*  
59  
60

1  
2  
3  
4  
5  
6  
7  
8  
9  
10  
11  
12  
13  
14  
15  
16  
17  
18  
19  
20  
21  
22  
23  
24  
25  
26  
27  
28  
29  
30  
31  
32  
33  
34  
35  
36  
37  
38  
39  
40  
41  
42  
43  
44  
45  
46  
47  
48  
49  
50  
51  
52  
53  
54  
55  
56  
57  
58  
59  
60

376 Epidemiol. 2015;7:449–90.

377

378 **Figure legends:**

379 Figure 1: Flowchart of the referral process to cardiac rehabilitation

For peer review only

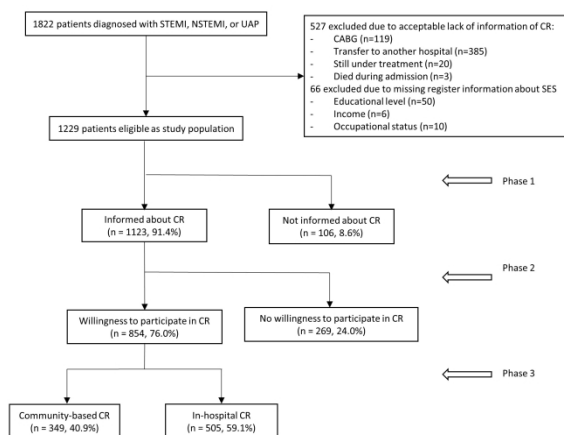

Figure 1: Flowchart of the referral process to cardiac rehabilitation

338x190mm (300 x 300 DPI)



1  
2  
3  
4 **ONLINE SUPPLEMENTARY MATERIAL**  
5

6  
7 **Table S1:** Baseline Characteristics of excluded patients

|                             | Excluded |
|-----------------------------|----------|
| Characteristics             | n = 593  |
| Male (n, %)                 | 423      |
| Age Group (years)           |          |
| < 65                        | 242      |
| 65-74                       | 171      |
| ≥ 75                        | 180      |
| Civil status (n, %)         |          |
| Married/Partnership         | 378      |
| Divorced/Unmarried/Widow    | >210     |
| Missing                     | <5       |
| Occupational status (n, %)  |          |
| Employed                    | 158      |
| Unemployed/out of workforce | 417      |
| Missing                     | 18       |
| Educational level (n, %)    |          |
| Low                         | 256      |
| Medium                      | 200      |
| High                        | 52       |
| Missing                     | 72       |
| Income, tertile (n, %)      |          |
| Low                         | 245      |
| Medium                      | 197      |
| High                        | >145     |
| Missing                     | <5       |
| Charlson Comorbidity Index  |          |
| Low (0 points)              | 421      |
| Moderate/High (>0 points)   | 75       |
| Missing                     | 97       |

**Table S2:** Logistic regression model for those excluded compared with those included in the study population,  
n = 1822

|                          | n, (%)       | Unadjusted |           | Multivariable adjusted* |           |
|--------------------------|--------------|------------|-----------|-------------------------|-----------|
|                          |              | OR         | 95% CI    | OR                      | 95% CI    |
| Observations             | 593 (32.5)   |            |           |                         |           |
| Civil status             |              |            |           |                         |           |
| Married/Partnership      | 378 (20.7)   | 1 (ref.)   |           | 1 (ref.)                |           |
| Divorced/Unmarried/Widow | >210 (>11.5) | 1.02       | 0.83-1.25 | 0.85                    | 0.67-1.07 |
| Missing                  | <5 (<1)      |            |           |                         |           |
| Occupational status      |              |            |           |                         |           |
| Employed                 | 158 (8.7)    | 1 (ref.)   |           | 1 (ref.)                |           |
| Unemployed/Retired       | 417 (22.9)   | 1.69       | 1.36-2.09 | 1.54                    | 1.14-2.08 |
| Missing                  | 18 (1.0)     |            |           |                         |           |
| Educational level        |              |            |           |                         |           |
| Low                      | 256 (14.1)   | 1 (ref.)   |           | 1 (ref.)                |           |
| Medium                   | 200 (10.1)   | 0.77       | 0.61-0.96 | 0.77                    | 0.61-0.97 |
| High                     | 49 (2.7)     | 0.59       | 0.42-0.84 | 0.60                    | 0.41-0.87 |
| Missing                  | 72 (4.0)     |            |           |                         |           |
| Income, tertiles         |              |            |           |                         |           |
| Low                      | 245 (13.4)   | 1 (ref.)   |           | 1 (ref.)                |           |
| Medium                   | 197 (10.8)   | 0.71       | 0.56-0.90 | 0.77                    | 0.59-1.01 |
| High                     | >145 (>7.9)  | 0.46       | 0.36-0.59 | 0.55                    | 0.40-0.75 |
| Missing                  | <5 (<0.3)    |            |           |                         |           |

\* Adjusted for age, gender, ACS diagnosis, Charlson Comorbidity Index. OR: odds ratio; CI: confidence interval

**STROBE 2007 (v4) Statement—Checklist of items that should be included in reports of *cross-sectional studies***

| Section/Topic                | Item # | Recommendation                                                                                                                                                                       | Reported on page # |
|------------------------------|--------|--------------------------------------------------------------------------------------------------------------------------------------------------------------------------------------|--------------------|
| <b>Title and abstract</b>    | 1      | (a) Indicate the study’s design with a commonly used term in the title or the abstract                                                                                               | 1                  |
|                              |        | (b) Provide in the abstract an informative and balanced summary of what was done and what was found                                                                                  | 2                  |
| <b>Introduction</b>          |        |                                                                                                                                                                                      |                    |
| Background/rationale         | 2      | Explain the scientific background and rationale for the investigation being reported                                                                                                 | 3-4                |
| Objectives                   | 3      | State specific objectives, including any prespecified hypotheses                                                                                                                     | 4                  |
| <b>Methods</b>               |        |                                                                                                                                                                                      |                    |
| Study design                 | 4      | Present key elements of study design early in the paper                                                                                                                              | 5                  |
| Setting                      | 5      | Describe the setting, locations, and relevant dates, including periods of recruitment, exposure, follow-up, and data collection                                                      | 5                  |
| Participants                 | 6      | (a) Give the eligibility criteria, and the sources and methods of selection of participants                                                                                          | 5-6                |
| Variables                    | 7      | Clearly define all outcomes, exposures, predictors, potential confounders, and effect modifiers. Give diagnostic criteria, if applicable                                             | 6-7                |
| Data sources/<br>measurement | 8*     | For each variable of interest, give sources of data and details of methods of assessment (measurement). Describe comparability of assessment methods if there is more than one group | 7                  |
| Bias                         | 9      | Describe any efforts to address potential sources of bias                                                                                                                            | 7                  |
| Study size                   | 10     | Explain how the study size was arrived at                                                                                                                                            | 5-6                |
| Quantitative variables       | 11     | Explain how quantitative variables were handled in the analyses. If applicable, describe which groupings were chosen and why                                                         | 6-7                |
| Statistical methods          | 12     | (a) Describe all statistical methods, including those used to control for confounding                                                                                                | 7                  |
|                              |        | (b) Describe any methods used to examine subgroups and interactions                                                                                                                  | 7-8                |
|                              |        | (c) Explain how missing data were addressed                                                                                                                                          | 5                  |
|                              |        | (d) If applicable, describe analytical methods taking account of sampling strategy                                                                                                   | N/A                |
|                              |        | (e) Describe any sensitivity analyses                                                                                                                                                | 7-8                |
| <b>Results</b>               |        |                                                                                                                                                                                      |                    |

|                          |     |                                                                                                                                                                                                              |       |
|--------------------------|-----|--------------------------------------------------------------------------------------------------------------------------------------------------------------------------------------------------------------|-------|
| Participants             | 13* | (a) Report numbers of individuals at each stage of study—eg numbers potentially eligible, examined for eligibility, confirmed eligible, included in the study, completing follow-up, and analysed            | 8     |
|                          |     | (b) Give reasons for non-participation at each stage                                                                                                                                                         | 8     |
|                          |     | (c) Consider use of a flow diagram                                                                                                                                                                           | 8     |
| Descriptive data         | 14* | (a) Give characteristics of study participants (eg demographic, clinical, social) and information on exposures and potential confounders                                                                     | 8-9   |
|                          |     | (b) Indicate number of participants with missing data for each variable of interest                                                                                                                          | 6     |
| Outcome data             | 15* | Report numbers of outcome events or summary measures                                                                                                                                                         | 6+8   |
| Main results             | 16  | (a) Give unadjusted estimates and, if applicable, confounder-adjusted estimates and their precision (eg, 95% confidence interval). Make clear which confounders were adjusted for and why they were included | 9-12  |
|                          |     | (b) Report category boundaries when continuous variables were categorized                                                                                                                                    | 9-12  |
|                          |     | (c) If relevant, consider translating estimates of relative risk into absolute risk for a meaningful time period                                                                                             | N/A   |
| Other analyses           | 17  | Report other analyses done—eg analyses of subgroups and interactions, and sensitivity analyses                                                                                                               | 12    |
| <b>Discussion</b>        |     |                                                                                                                                                                                                              |       |
| Key results              | 18  | Summarise key results with reference to study objectives                                                                                                                                                     | 12-13 |
| Limitations              | 19  | Discuss limitations of the study, taking into account sources of potential bias or imprecision. Discuss both direction and magnitude of any potential bias                                                   | 14-15 |
| Interpretation           | 20  | Give a cautious overall interpretation of results considering objectives, limitations, multiplicity of analyses, results from similar studies, and other relevant evidence                                   | 13-15 |
| Generalisability         | 21  | Discuss the generalisability (external validity) of the study results                                                                                                                                        | 14    |
| <b>Other information</b> |     |                                                                                                                                                                                                              |       |
| Funding                  | 22  | Give the source of funding and the role of the funders for the present study and, if applicable, for the original study on which the present article is based                                                | 16    |

\*Give information separately for cases and controls in case-control studies and, if applicable, for exposed and unexposed groups in cohort and cross-sectional studies.

**Note:** An Explanation and Elaboration article discusses each checklist item and gives methodological background and published examples of transparent reporting. The STROBE checklist is best used in conjunction with this article (freely available on the Web sites of PLoS Medicine at <http://www.plosmedicine.org/>, Annals of Internal Medicine at <http://www.annals.org/>, and Epidemiology at <http://www.epidem.com/>). Information on the STROBE Initiative is available at [www.strobe-statement.org](http://www.strobe-statement.org).

# BMJ Open

## Influence of socio-economic status on the referral process to cardiac rehabilitation following acute coronary syndrome: a cross-sectional study

|                                 |                                                                                                                                                                                                                                                                                                                                                                                                                                                                                                                                                                                                                                                                                           |
|---------------------------------|-------------------------------------------------------------------------------------------------------------------------------------------------------------------------------------------------------------------------------------------------------------------------------------------------------------------------------------------------------------------------------------------------------------------------------------------------------------------------------------------------------------------------------------------------------------------------------------------------------------------------------------------------------------------------------------------|
| Journal:                        | <i>BMJ Open</i>                                                                                                                                                                                                                                                                                                                                                                                                                                                                                                                                                                                                                                                                           |
| Manuscript ID                   | bmjopen-2019-036088.R2                                                                                                                                                                                                                                                                                                                                                                                                                                                                                                                                                                                                                                                                    |
| Article Type:                   | Original research                                                                                                                                                                                                                                                                                                                                                                                                                                                                                                                                                                                                                                                                         |
| Date Submitted by the Author:   | 19-Feb-2020                                                                                                                                                                                                                                                                                                                                                                                                                                                                                                                                                                                                                                                                               |
| Complete List of Authors:       | Graversen, Christina Boesgaard; Aalborg University Hospital, Department of Cardiology, Department of Clinical Medicine<br>Johansen, Martin; Aalborg University Hospital, Unit of Clinical Biostatistics<br>Eichhorst, Regina; Slagelse Hospital, Department of Cardiology<br>Johnsen, Søren Paaske; Aalborg University, Danish Center for Clinical Health Services Research, Department of Clinical Medicine<br>Riahi, Sam; Aalborg University Hospital, Department of Cardiology, Department of Clinical Medicine<br>Holmberg, Teresa; University of Southern Denmark, National Institute of Public Health<br>Larsen, Mogens Lytken; Aalborg University, Department of Clinical Medicine |
| <b>Primary Subject Heading</b>: | Cardiovascular medicine                                                                                                                                                                                                                                                                                                                                                                                                                                                                                                                                                                                                                                                                   |
| Secondary Subject Heading:      | Rehabilitation medicine                                                                                                                                                                                                                                                                                                                                                                                                                                                                                                                                                                                                                                                                   |
| Keywords:                       | Cardiac Epidemiology < CARDIOLOGY, Adult cardiology < CARDIOLOGY, Myocardial infarction < CARDIOLOGY                                                                                                                                                                                                                                                                                                                                                                                                                                                                                                                                                                                      |
|                                 |                                                                                                                                                                                                                                                                                                                                                                                                                                                                                                                                                                                                                                                                                           |

SCHOLARONE™  
Manuscripts



I, the Submitting Author has the right to grant and does grant on behalf of all authors of the Work (as defined in the below author licence), an exclusive licence and/or a non-exclusive licence for contributions from authors who are: i) UK Crown employees; ii) where BMJ has agreed a CC-BY licence shall apply, and/or iii) in accordance with the terms applicable for US Federal Government officers or employees acting as part of their official duties; on a worldwide, perpetual, irrevocable, royalty-free basis to BMJ Publishing Group Ltd ("BMJ") its licensees and where the relevant Journal is co-owned by BMJ to the co-owners of the Journal, to publish the Work in this journal and any other BMJ products and to exploit all rights, as set out in our [licence](#).

The Submitting Author accepts and understands that any supply made under these terms is made by BMJ to the Submitting Author unless you are acting as an employee on behalf of your employer or a postgraduate student of an affiliated institution which is paying any applicable article publishing charge ("APC") for Open Access articles. Where the Submitting Author wishes to make the Work available on an Open Access basis (and intends to pay the relevant APC), the terms of reuse of such Open Access shall be governed by a Creative Commons licence – details of these licences and which [Creative Commons](#) licence will apply to this Work are set out in our licence referred to above.

Other than as permitted in any relevant BMJ Author's Self Archiving Policies, I confirm this Work has not been accepted for publication elsewhere, is not being considered for publication elsewhere and does not duplicate material already published. I confirm all authors consent to publication of this Work and authorise the granting of this licence.

1  
2  
3  
4 1 **Title: Influence of socio-economic status on the referral process to cardiac**  
5  
6 2 **rehabilitation following acute coronary syndrome: a cross-sectional study**  
7  
8  
9

10 3 **Authors:**

11  
12 4 Christina Boesgaard Graversen<sup>a,b\*</sup>, Martin Berg Johansen<sup>c</sup>, Regina Eichhorst<sup>d</sup>, Søren Paaske  
13  
14 5 Johnsen<sup>e</sup>, Sam Riahi<sup>a,b</sup>, Teresa Holmberg<sup>f</sup>, Mogens Lytken Larsen<sup>b</sup>  
15  
16

17 6 **Affiliations:**

- 18  
19 7 a. Department of Cardiology, Aalborg University Hospital, Aalborg, Denmark  
20  
21 8 b. Department of Clinical Medicine, Aalborg University, Aalborg, Denmark  
22  
23 9 c. Unit of Clinical Biostatistics, Aalborg University Hospital, Aalborg, Denmark  
24  
25  
26 10 d. Department of Cardiology, Slagelse Hospital, Slagelse, Denmark  
27  
28 11 e. Danish Center for Clinical Health Services Research, Department of Clinical Medicine, Aalborg  
29  
30 12 University and Aalborg University Hospital, Aalborg, Denmark  
31  
32 13 f. National Institute of Public Health, University of Southern Denmark, Copenhagen, Denmark  
33  
34  
35

36 14 **Information about previous presentation of the whole or part of the work presented in the article:**

37  
38 15 Parts of the work has been presented in a poster format at the ESC Congress 2019.  
39

40 16 **Sources of support, for all authors, for the work in the form of grants:**

41  
42 17 This work was supported by grants from the Karen Elise Jensen's Foundation and the Danish Heart  
43  
44 18 Foundation (18-R123-A8283-22081).  
45  
46

47 19 **Disclaimers, if any:**

48  
49 20 None  
50

51 21 **Corresponding author:**

52  
53 22 Christina Boesgaard Graversen, postal address: Holger Danskes Vej 73, 2nd Floor Left, 2000  
54  
55 23 Frederiksberg, DK, mail: [c.graversen@rn.dk](mailto:c.graversen@rn.dk)  
56  
57

58 24 **Word count:** 3373 words  
59  
60

## 25 Abstract

26 **Objective:** to evaluate the association between socio-economic status (SES) and referral to cardiac  
27 rehabilitation (CR) after incident acute coronary syndrome (ACS) by dividing the referral process into  
28 three phases (1. informed about CR, 2. willingness to participate in CR, and 3. assigned CR setting).

29 **Design:** Cross-sectional study.

30 **Setting:** Department of Cardiology at a Danish University Hospital from 1 January 2011 to 31 December  
31 2014.

32 **Participants:** A total of 1229 patients assessed for CR during hospitalisation with ACS were  
33 prospectively registered in the Rehab-North Register from 2011-2014. SES was assessed using data  
34 from national registers, concerning: personal income, occupational status, educational level, and civil  
35 status. Patients were excluded if in one of the following criteria were fulfilled: 1) missing data on SES, or  
36 2) acceptable reason for not informing patients about CR (treatment with coronary artery bypass graft,  
37 transfer to another hospital, still under treatment, or death).

38 **Main outcome measures:** Outcomes were defined by dividing the referral process into three phases: 1.  
39 informed about CR, 2. willingness to participate, and 3. assigned CR setting (in-hospital /community  
40 centre) after ACS.

41 **Results:** A total of 854 (69.5 %) patients were referred to CR. After adjustment for age, gender, ACS  
42 diagnosis (ST-Elevated Myocardial Infarction, Non-ST-Elevated Myocardial Infarction, Unstable Angina  
43 Pectoris) and comorbidity, high income had the strongest association of referral to CR in all three  
44 phases (informed about CR: OR 2.17, 95% CI: 1.0- 4.64; willingness to participate in CR: OR 1.55, 95% CI:  
45 1.02-2.35; assigned in-hospital CR: OR 1.47, 95% CI: 0.91-2.36). Educational level showed similar  
46 tendencies, however not statistically significant. The results did not vary according to gender.



1  
2  
3  
4 47 **Conclusion:** This is the first study to investigate the referral process to CR using a three-phase structure.

5  
6 48 It suggests income and education to influence all phases in the referral process to CR after ACS.

7  
8  
9 49 **Keywords:** Acute Myocardial Infarction, Cardiac Rehabilitation, Referral Process, Socio-economic Status

## 10 11 50 **Strengths and limitations of this study**

- 12  
13  
14 51 - This is the first study to investigate the referral process to cardiac rehabilitation (CR) using a
- 15  
16 52 three-phase structure (1. informed about CR, 2. willingness to participate in CR, and 3. assigned
- 17  
18 53 CR setting) which provides better knowledge in understanding why social inequality persists in
- 19  
20 54 referral to CR.
- 21  
22  
23 55 - Socio-economic variables were provided by highly validated Danish register data using the
- 24  
25 56 unique 10-digit civil registration number that is given to all Danish citizens.
- 26  
27 57 - Multivariable logistic regression analyses were used to minimise potential confounding.
- 28  
29  
30 58 - Data was not gathered for specific scientific purposes and it cannot be ruled out that not all
- 31  
32 59 patients admitted with Acute Coronary Syndrome were identified. However, such loss was
- 33  
34 60 considered unsystematic and unintended and should not pose a problem for bias introduction.
- 35  
36  
37

## 38 61 **Introduction**

39  
40  
41 62 Low socio-economic status (SES) is associated with higher risk of developing Ischemic Heart Disease

42  
43 63 (IHD) and poorer subsequent outcome, including higher risk of recurrent cardiovascular events and

44  
45 64 cardiac-related mortality.(1–5) Cardiac rehabilitation (CR) is an important step to reduce disease

46  
47 65 outcomes and is an integral part of IHD care as it aims to improve quality of life as well as patients’

48  
49 66 physical, psychological, and social functioning.(4)

50  
51  
52 67 CR comprises exercise therapy, psychological consulting, treatment-targeted therapy, and life-style

53  
54 68 changing modules (dietary modification, and smoking cessation).(4) The program is a coordinated effort

55  
56 69 made by cardiologists, nurses, physiotherapists, dietitians, and eventually occupational therapists. If

57  
58 70 needed, psychologists, social workers, or priests may be included as well.(4)

59  
60

1  
2  
3  
4 71 The efficacy of CR in reducing cardiovascular mortality and risk of hospital readmissions is well-  
5  
6 72 documented.(6–8) It therefore seems irrational that international research in general continues to find  
7  
8 73 CR “referral” or “participation and completion” rates to be unsatisfactory.(9–13)  
9  
10 74 Different socio-economic characteristics (income, educational level, occupational status, civil status) are  
11  
12 75 shown to be associated with CR underutilization.(14) Low income and educational level have  
13  
14 76 irrespectively of type of health care system repeatedly been associated with limited participation and  
15  
16 77 completion rate.(11,15) It is consequently of major importance to eliminate the socio-economic  
17  
18 78 differences in CR if the inequality in IHD burden is to be reduced.  
19  
20  
21 79 Obstacles in referral and participation to CR among patients with lower SES may be due to system-level  
22  
23 80 and personal barriers.(16) System-level barriers covers physicians recommendations, the interaction  
24  
25 81 with the healthcare team, and misconceptions about CR. Personal barriers includes perception about  
26  
27 82 IHD and CR, and belief about the ability to control IHD.(16) However, vulnerable elements in the  
28  
29 83 referral process prone to socio-economic inequality among patients with Acute Coronary Syndrome  
30  
31 84 (ACS) remain unexplored. By dividing the referral process into three phases, it is possible to evaluate if  
32  
33 85 such inequality is the result of selection of patients at the system-level (the process of informing  
34  
35 86 patients about CR and the setting of CR that patients are referred to) rather than the person-level  
36  
37 87 (patients’ own willingness to participate in CR). To our knowledge, no study has analysed the entire  
38  
39 88 referral process using such three-phase structure while controlling for confounders in a population of  
40  
41 89 patients surviving ACS. Therefore, the objective of this study was to investigate how SES is associated  
42  
43 90 with the patients’ chances of 1) being informed about CR, 2) willingness to participate, and 3) assigned  
44  
45 91 CR setting (in-hospital or community centre). Phase 3 was determined by regional guidelines: patients  
46  
47 92 suffering ST-Elevated Myocardial Infarction (STEMI) or complicated Non-ST-Elevated Myocardial  
48  
49 93 Infarction (NSTEMI) were offered in-hospital CR whereas patients with uncomplicated NSTEMI and  
50  
51 94 Unstable Angina Pectoris (UAP) were offered CR in a community centre).  
52  
53  
54  
55  
56  
57  
58  
59  
60

## 96 **Methods**

97 The study followed the STROBE guidelines for cross-sectional studies.(17)

### 98 **Study design**

99 This population-based study used data from the Rehab-North Register. Its content has previously been  
100 described.(18) In short, the Rehab-North Register holds data on all patients hospitalised at the  
101 Department of Cardiology, Aalborg University Hospital from 1 January 2011 to 31 December 2014 with  
102 a diagnosis of ACS. All were assessed for eligibility to CR using a questionnaire.(18)

103 In Denmark, CR fully or partially takes place in-hospital or at community centres. In-hospital CR is  
104 reserved for high-risk patients and is structured with a more complex intervention. The Danish Public  
105 Health System is tax paid, enabling CR to be free of charge for the patient.

### 106 **Patient and Public involvement statement**

107 No patients were involved in the design, or conduct, or reporting, or dissemination plans of our  
108 research.

### 109 **Study Population**

110 The study population was identified in the Rehab-North Register as patients diagnosed with ACS (ICD-  
111 10: I20.0, I21.). The registered diagnosis was verified by linking data from the Rehab-North Register  
112 with the Danish National Patient Register (NPR) and the Danish Register of Causes of Death.(19) If any  
113 discrepancy arose, the diagnosis registered in the NPR was selected. Patients were excluded if in one of  
114 the following criteria were fulfilled: 1) missing data on SES 2) acceptable reason for not informing  
115 patients about CR, including treatment with coronary artery bypass graft, transfer to another hospital,  
116 still under treatment, or death. Patients who underwent coronary artery bypass grafting was informed  
117 about CR at the Thoracic Surgery Department performing the operation. Patients who were 'transferred

1  
2  
3  
4 118 to another hospital' received information about CR at other cardiology departments. We were not able  
5  
6 119 to receive confirmation regarding referral to CR in this patient group.

7  
8 120 The study population and referral design using three phases is illustrated in figure 1.

### 9 10 121 **Socio-economic status**

11  
12 122 Different indicators of SES (personal income, occupational status, educational level, and civil status)  
13  
14 123 were chosen, due to a priori knowledge about their proposed mechanisms associated to the outcome  
15  
16 124 variable. Ascertainment of socio-economic variables from national registers was done by linkage of a  
17  
18 125 unique personal number given to all Danish residents.

19  
20 126 The Income Statistics Register provided information regarding both disposable personal income (low,  
21  
22 127 medium, high) calculated for the calendar year before disease onset, and occupational status  
23  
24 128 (employed, unemployed/out of workforce) set for the calendar year before disease onset.(20) A  
25  
26 129 person's highest obtained educational level (low, medium, high) was based on the International  
27  
28 130 Standard Classification of Education (ISCED)(21) from the Student's Register(22), and civil status  
29  
30 131 (married/partnership, divorced/unmarried /widow) from the Civil Registration System (CRS).(23)

### 31 32 33 34 35 132 **Outcomes**

36  
37 133 Outcomes were defined by dividing the referral process into three phases: 1. informed about CR, 2.  
38  
39 134 willingness to participate, and 3. assigned CR setting (in-hospital /community centre) after ACS.  
40  
41 135 All outcome information gathering were done during the patients' hospitalisation and included in the  
42  
43 136 questionnaires that founded the Rehab-North Register.

### 44 45 46 47 48 137 **Covariates**

49  
50 138 The selection of covariates to be included in the multivariable analyses was done based on directed  
51  
52 139 acyclic graph (not shown). Age was registered at time of diagnosis and categorized into three groups: <  
53  
54 140 65 years, 65-74 years, and  $\geq$  75 years. Information regarding age and gender was gathered from the  
55  
56 141 CRS.(23) Comorbidity diagnoses were defined by the Charlson Comorbidity Index (CCI), but only

1  
2  
3  
4 142 diagnoses from the year 2011 until hospitalisation were accessible. Comorbidity diagnoses was drawn  
5  
6 143 from the NPR.(24) In general, patients with NSTEMI and UAP are less likely referred to CR compared to  
7  
8 144 patients with STEMI.(25) Therefore, to get an accurate estimate of the impacts of patients' SES on CR  
9  
10 145 referral, ACS diagnosis (STEMI, NSTEMI, UAP) were included as a covariate.(25)  
11

## 12 146 **Statistical analysis**

13  
14  
15 147 Baseline characteristics of study population were summarised by frequencies and percentages. The  
16  
17 148 association between socio-economic variables and being informed about CR, willingness to participate,  
18  
19 149 and assigned CR setting was assessed by crude (model 1) and multivariable logistic regression adjusted  
20  
21 150 for confounders (age, gender, ACS diagnosis, CCI) (model 2). Results were presented in odds ratios (OR)  
22  
23 151 with 95% confidence intervals (95% CI). Potential effect modification by gender was assessed by  
24  
25 152 stratification and likelihood-ratio tests as studies have found females to experience lower rates of  
26  
27 153 referral to CR compared to males.(10,26) Statistical analyses were performed using Stata Software  
28  
29 154 (v.15.1; Stata Corp. College Station, TX).  
30  
31  
32  
33

## 34 155 **Results**

35  
36  
37 156 Of the original cohort of 1822 patients diagnosed with ACS, only patients with no missing socio-  
38  
39 157 economic variables, and no acceptable reasons for not being informed about CR were included in the  
40  
41 158 study (figure 1). This resulted in a study population comprising 1229 patients (73.8% male). The  
42  
43 159 patients' baseline characteristics, stratified by diagnosis, are presented in table 1. STEMI patients were  
44  
45 160 relatively younger and still an available workforce with higher income. In the study population, 1123  
46  
47 161 (91.4%) patients were informed about CR of which 854 (76.0%) patients subsequently agreed to  
48  
49 162 participate in the program. Of those, 349 (40.9%) patients were referred to CR in a community centre  
50  
51 163 and 505 (59.1%) patients were referred to in-hospital CR (figure 1).  
52  
53  
54  
55  
56 164

57 **Table 1:** Characteristics of study population stratified by diagnosis  
58  
59  
60

---

|                             | Full population | STEMI      | NSTEMI     | UAP        |
|-----------------------------|-----------------|------------|------------|------------|
| Characteristics             | n = 1229        | n = 402    | n = 711    | n = 116    |
| Male (n, %)                 | 907 (73.8)      | 322 (80.1) | 503 (70.7) | 82 (70.7)  |
| Age Group (years)           |                 |            |            |            |
| < 65                        | 591 (48.1)      | 227 (56.5) | 308 (43.3) | 56 (48.3)  |
| 65-74                       | 371 (30.2)      | 116 (28.9) | 215 (30.2) | 40 (34.5)  |
| ≥ 75                        | 267 (21.7)      | 59 (14.7)  | 188 (26.4) | 20 (17.2)  |
| Civil status (n, %)         |                 |            |            |            |
| Married/Partnership         | 793 (64.5)      | 253 (62.9) | 449 (63.2) | 91 (78.4)  |
| Divorced/Unmarried/Widow    | 436 (35.5)      | 149 (37.1) | 262 (36.8) | 25 (21.6)  |
| Occupational status (n, %)  |                 |            |            |            |
| Employed                    | 479 (39.0)      | 195 (48.5) | 240 (33.8) | 44 (37.9)  |
| Unemployed/out of workforce | 750 (61.0)      | 207 (51.5) | 471 (66.2) | 72 (62.1)  |
| Educational level (n, %)    |                 |            |            |            |
| Low                         | 516 (42.0)      | 144 (35.8) | 322 (45.3) | 50 (43.1)  |
| Medium                      | 539 (43.9)      | 201 (50.0) | 293 (41.2) | 45 (38.8)  |
| High                        | 174 (14.2)      | 57 (14.2)  | 96 (13.5)  | 21 (18.1)  |
| Income, tertile (n, %)      |                 |            |            |            |
| Low                         | 405 (33.0)      | 113 (28.1) | 251 (35.3) | 41 (35.3)  |
| Medium                      | 406 (33.0)      | 124 (30.8) | 247 (34.7) | 35 (30.2)  |
| High                        | 418 (34.0)      | 165 (41.0) | 213 (30.0) | 40 (34.5)  |
| Charlson Comorbidity Index  |                 |            |            |            |
| Low (0 points)              | 1088 (88.5)     | 358 (89.1) | 630 (88.6) | 100 (86.2) |
| Moderate/High (>0 points)   | 141 (11.5)      | 44 (10.9)  | 81 (11.4)  | 16 (13.8)  |

165 STEMI: ST-elevated myocardial infarction; NSTEMI: non-ST-elevated myocardial infarction; UAP: unstable angina  
 166 pectoris

1  
2  
3  
4 167 **Phase 1: SES and being informed about CR**

5  
6 168 Higher income and educational level had positive crude associations with being informed about CR

7  
8 169 whereas being unemployed/out of workforce or single-living had a negative association (table 2). These

9  
10 170 associations were greatly reduced after adjustment for age, gender, ACS diagnosis, and CCI. The

11  
12 171 adjusted regression analysis found high income to be associated with being informed about CR (OR

13  
14 172 2.17, 95% CI: 1.01; 4.64). High educational level was also associated with being informed about CR

15  
16 173 although the association did not reach statistical significance (OR: 1.60, 95% CI: 0.72-3.54).

17  
18  
19  
20 174

21  
22 **Table 2:** Logistic regression model for being informed about cardiac rehabilitation, n = 1229

|                             | Full study<br>population<br>n, (%) | Informed<br>about CR<br>n, (%) | Unadjusted |           | Multivariable adjusted* |           |
|-----------------------------|------------------------------------|--------------------------------|------------|-----------|-------------------------|-----------|
|                             |                                    |                                | OR         | 95% CI    | OR                      | 95% CI    |
| Observations                | 1229 (100)                         | 1123 (91.4)                    |            |           |                         |           |
| Civil status                |                                    |                                |            |           |                         |           |
| Married/Partnership         | 793 (64.5)                         | 735 (59.8)                     | 1 (ref.)   |           | 1 (ref.)                |           |
| Divorced/Unmarried/Widow    | 436 (35.5)                         | 388 (31.6)                     | 0.64       | 0.43-0.95 | 0.76                    | 0.49-1.19 |
| Occupational status         |                                    |                                |            |           |                         |           |
| Employed                    | 479 (39.0)                         | 469 (38.2)                     | 1 (ref.)   |           | 1 (ref.)                |           |
| Unemployed/out of workforce | 750 (61.0)                         | 654 (53.2)                     | 0.15       | 0.07-0.28 | 0.46                    | 0.20-1.07 |
| Educational level           |                                    |                                |            |           |                         |           |
| Low                         | 516 (42.0)                         | 452 (36.8)                     | 1 (ref.)   |           | 1 (ref.)                |           |
| Medium                      | 539 (43.9)                         | 505 (41.1)                     | 2.10       | 1.36-3.25 | 1.17                    | 0.72-1.89 |
| High                        | 174 (14.2)                         | 166 (13.5)                     | 2.94       | 1.38-6.26 | 1.60                    | 0.72-3.54 |
| Income, tertiles            |                                    |                                |            |           |                         |           |
| Low                         | 405 (33.0)                         | 342 (27.8)                     | 1 (ref.)   |           | 1 (ref.)                |           |
| Medium                      | 406 (33.0)                         | 374 (30.4)                     | 2.15       | 1.37-3.38 | 1.40                    | 0.86-2.28 |

High 418 (34.0) 407 (33.1) 6.82 3.54-13.14 2.17 1.01-4.64

\* Adjusted for age, gender, ACS diagnosis, Charlson Comorbidity Index. OR: odds ratio; CI: confidence interval

175

176

177

178

179

180

181

182

183

184

185

186

187

188

189

190

191

192

193

194

195

196

197

198

199

200

201

202

203

204

205

206

207

208

209

210

211

212

213

214

215

216

217

218

219

220

221

222

223

224

225

226

227

228

## Phase 2: SES and willingness to participate in CR

High income, high educational level, and being single-living (divorced/unmarried/widow) were all

associated with a higher likelihood of willingness to participate in CR in the crude analyses (table 3).

Being unemployed/retired was negatively associated with being willing to participate in CR. After

adjustment, high income level had the highest OR (OR 1.55, 95% CI: 1.02; 2.35) in relation to willingness

to participate. A similar pattern was observed for high educational level although the association was

not statistically significant (OR 1.21, 95% CI: 0.78; 1.88). Likewise, being single-living was also associated

with willingness to participate in CR, although, the estimates did not reach statistical significance (OR

1.28, 95% CI: 0.93; 1.76).

**Table 3:** Logistic regression model for willingness to participate in cardiac rehabilitation, n = 1123

|                             | Full study<br>population<br>n, (%) | Willingness to<br>participate in CR<br>n, (%) | Unadjusted |           | Multivariable adjusted* |           |
|-----------------------------|------------------------------------|-----------------------------------------------|------------|-----------|-------------------------|-----------|
|                             |                                    |                                               | OR         | 95% CI    | OR                      | 95% CI    |
| Observations                | 1229 (100)                         | 854 (76.0)                                    |            |           |                         |           |
| Civil status                |                                    |                                               |            |           |                         |           |
| Married/Partnership         | 793 (64.5)                         | 546 (48.6)                                    | 1 (ref.)   |           | 1 (ref.)                |           |
| Divorced/Unmarried/Widow    | 436 (35.5)                         | 308 (27.4)                                    | 1.33       | 0.99-1.79 | 1.28                    | 0.93-1.76 |
| Occupational status         |                                    |                                               |            |           |                         |           |
| Employed                    | 479 (39.0)                         | 388 (34.6)                                    | 1 (ref.)   |           | 1 (ref.)                |           |
| Unemployed/out of workforce | 750 (61.0)                         | 466 (41.5)                                    | 0.52       | 0.39-0.69 | 0.93                    | 0.62-1.40 |
| Educational level           |                                    |                                               |            |           |                         |           |
| Low                         | 516 (42.0)                         | 322 (28.7)                                    | 1 (ref.)   |           | 1 (ref.)                |           |
| Medium                      | 539 (43.9)                         | 405 (36.1)                                    | 1.64       | 1.21-2.20 | 1.36                    | 0.98-1.88 |



|                  |            |            |          |           |          |           |
|------------------|------------|------------|----------|-----------|----------|-----------|
| High             | 174 (14.2) | 127 (11.3) | 1.31     | 0.87-1.99 | 1.21     | 0.78-1.88 |
| Income, tertiles |            |            |          |           |          |           |
| Low              | 405 (33.0) | 229 (20.4) | 1 (ref.) |           | 1 (ref.) |           |
| Medium           | 406 (33.0) | 288 (25.6) | 1.65     | 1.19-2.30 | 1.35     | 0.94-1.94 |
| High             | 418 (34.0) | 337 (30.0) | 2.38     | 1.69-3.34 | 1.55     | 1.02-2.35 |

\* Adjusted for age, gender, ACS diagnosis, Charlson Comorbidity Index. OR: odds ratio; CI: confidence interval

185

### 186 Phase 3: SES and assigned CR setting

187 Table 4 shows the association of SES on being assigned to in-hospital CR compared to CR in a  
 188 community centre. High income was significantly associated with assignment to in-hospital CR (OR:  
 189 2.10, 95% CI: 1.49; 2.97) but the association was attenuated after adjustment for confounders (income:  
 190 adjusted OR: 1.47, 95% CI: 0.91; 2.36).

**Table 4:** Logistic regression model for assigned cardiac rehabilitation setting, n = 854

|                             | Full study<br>population<br>n, (%) | Assigned<br>CR-setting<br>n, (%) | Unadjusted |           | Multivariable adjusted* |           |
|-----------------------------|------------------------------------|----------------------------------|------------|-----------|-------------------------|-----------|
|                             |                                    |                                  | OR         | 95% CI    | OR                      | 95% CI    |
| Observations                | 1229 (100)                         | 505 (59.1)                       |            |           |                         |           |
| Civil status                |                                    |                                  |            |           |                         |           |
| Married/Partnership         | 793 (64.5)                         | 317 (37.1)                       | 1 (ref.)   |           | 1 (ref.)                |           |
| Divorced/Unmarried/Widow    | 436 (35.5)                         | 188 (22.0)                       | 1.13       | 0.85-1.51 | 1.20                    | 0.84-1.69 |
| Occupational status         |                                    |                                  |            |           |                         |           |
| Employed                    | 479 (39.0)                         | 268 (31.4)                       | 1 (ref.)   |           | 1 (ref.)                |           |
| Unemployed/out of workforce | 750 (61.0)                         | 237 (27.8)                       | 0.46       | 0.35-0.61 | 0.75                    | 0.49-1.15 |
| Educational level           |                                    |                                  |            |           |                         |           |
| Low                         | 516 (42.0)                         | 177 (20.7)                       | 1 (ref.)   |           | 1 (ref.)                |           |
| Medium                      | 539 (43.9)                         | 248 (29.0)                       | 1.29       | 0.96-1.74 | 0.90                    | 0.63-1.30 |

|                  |            |            |          |           |          |           |
|------------------|------------|------------|----------|-----------|----------|-----------|
| High             | 174 (14.2) | 80 (9.4)   | 1.39     | 0.91-2.13 | 1.20     | 0.72-1.99 |
| Income, tertiles |            |            |          |           |          |           |
| Low              | 405 (33.0) | 115 (13.5) | 1 (ref.) |           | 1 (ref.) |           |
| Medium           | 406 (33.0) | 161 (18.9) | 1.26     | 0.89-1.78 | 1.14     | 0.73-1.78 |
| High             | 418 (34.0) | 229 (26.8) | 2.10     | 1.49-2.97 | 1.47     | 0.91-2.36 |

\* Adjusted for age, gender, ACS diagnosis, Charlson Comorbidity Index. OR: odds ratio; CI: confidence interval

## 191 Supplementary analyses

192 The analyses were stratified by gender in a supplementary analysis. The results were not substantially  
193 different from the main analysis (not shown).

194 The baseline characteristics of patients being excluded from the study population was obtained (online  
195 supplementary material, table 1). After multivariable logistic regression, patients being excluded from  
196 the study population to have significantly lower SES compared to the patients being included (online  
197 supplementary material, table 2).

## 198 Discussion

199 In this study, the referral process to CR was assessed using a three-phase structure: 1. informed about  
200 CR, 2. willingness to participate in CR, and 3. assigned CR setting. After adjustment, high income was  
201 the only variable statistical significantly associated with referral to CR in phase 1 and 2, and  
202 insignificantly associated with phase 3 of the referral process. High educational level had a similar  
203 pattern, but the association did not reach statistical significance.

204 Overall, 69.5% of the patients were referred to CR, which is in accordance with earlier findings (22-  
205 81.5%).(9,10,25,26) Notably, in one study strikingly 86% was referred to CR after usage of a social  
206 differentiated intervention program.(27) However, it would be difficult to reproduce such a result in an  
207 observational study without this specific purpose.

208 The finding of patients' income and educational level to be associated with all three phases the referral  
209 process to CR may be explained by 'the Nordic Paradox' observed in the Nordic European

1  
2  
3  
4 210 countries.(28,29) These countries, covering Denmark, Norway, Sweden, and Finland, are 'welfare  
5  
6 211 states' with equal access to health care which theoretically ought to diminish the importance of  
7  
8 212 patients' level of income and education regarding access to health care services. However, this is not  
9  
10 213 the case as inequality e.g. in mortality, persists.(29) Although income inequality is smaller in the Nordic  
11  
12 214 countries, this still covers over inequality in wealth, housing condition, and material living conditions,  
13  
14 215 and are used together with educational level to assess latent socio-economic factors (health literacy,  
15  
16 216 greater burden of behavioral and biological risk factors, and reduced access to quality care and  
17  
18 217 medication).(30) Thus, our finding may imply such latent socio-economic factors to be important in the  
19  
20  
21 218 referral process to CR.

22  
23  
24 219 We found single-living to be potentially associated with the willingness to participate in CR. If such an  
25  
26 220 association is reproducible in later studies, then attention should focus on these patients without a  
27  
28 221 partner, who less often receive referral to CR, which has been attributed to lack of social support.(31)  
29  
30  
31 222 International studies find younger age, male gender, living with a partner, high educational level, and  
32  
33 223 high gross income to be predictors of CR referral.(10,25,31) This inequality in CR referral causes concern  
34  
35 224 as participation helps patients implement needed behavioural changes, which reduces cardiac-related  
36  
37 225 deaths.(6) Patients with low SES often have biological, behavioural, and psychosocial disadvantages  
38  
39 226 that may accelerate risk of cardiovascular diseases. Therefore, the need of referral, attendance, and  
40  
41 227 completion of CR should be prioritized in this patient group.(1,2)

42  
43  
44  
45 228 By splitting the referral process into three phases, new insights regarding importance of taking patients  
46  
47 229 SES into consideration when referring them to CR was gained. Our results show the importance of being  
48  
49 230 aware of system-level barriers present in the referral process. Moreover, identifying those patients who  
50  
51 231 need more motivation before being willing to enter a CR programme is highly important. In that way,  
52  
53 232 patients are well-informed about CR and able to make a well-considered decision regarding  
54  
55 233 participation.  
56  
57  
58  
59  
60

1  
2  
3  
4 234 Definition of SES is a conceptual challenge often solved by use of personal/family income, educational  
5  
6 235 level, civil status, and/or occupation. There is no consensus on which parameters to use as indicators of  
7  
8 236 SES. It has been argued to use single variables as proxy measurements for SES despite different causal  
9  
10 237 pathways. However, others find it problematic only to estimate SES by one parameter, as this may  
11  
12 238 increase the risk of residual confounding by unmeasured socio-economic circumstances.(1,32)  
13  
14 239 Moreover, the effect of socio-economic variables seems rather outcome-related and is suggested not to  
15  
16 240 be used interchangeably without thorough consideration.(33) As our central interest was to investigate  
17  
18 241 the impact of SES on the referral process to CR, and therefore use SES as exposure variable, we a priori  
19  
20 242 hypothesized the different variables all to be linked to our outcome measures. The risk of such an  
21  
22 243 approach was the introduction of collinearity. However, research finds e.g. educational level,  
23  
24 244 occupation, and income to measure different phenomena, to have different causal mechanisms, and in  
25  
26 245 part to be explained by other socio-economic parameters.(33,34) Since literature finds income,  
27  
28 246 educational level, occupational status, and civil status to be important determinants for referral,  
29  
30 247 participation, and completion of CR, it seemed most appropriate to include all variables in order to  
31  
32 248 answer our research questions. The consequence of this approach was that we cannot get a single  
33  
34 249 estimate that illustrates the effect of SES.  
35  
36  
37  
38  
39

40 250 Some caution must be taken when interpreting the results of our study. Firstly, data was not gathered  
41  
42 251 for specific scientific purposes and it cannot be ruled out that some patients admitted with ACS were  
43  
44 252 not included in the Rehab-North Register. However, such loss was considered unsystematic and  
45  
46 253 unintended and should not pose a problem for bias introduction. Moreover, the non-response analysis  
47  
48 254 found excluded patients to have lower SES compared to the included study population. As exclusion  
49  
50 255 was due to clinical implications (patients were to receive CR referral elsewhere), this should not pose a  
51  
52 256 problem for participation bias introduction in our study population.  
53  
54 257 Secondly, use of register data minimized risk of information bias, due to nationwide good algorithms for  
55  
56 258 correct diagnosis coding. Despite linkage to other registers, risk of residual or unmeasured confounding  
57  
58  
59  
60

1  
2  
3  
4 259 may be present.<sup>(35)</sup> Thirdly, there may be a risk of residual or unaccounted confounding, if data on  
5  
6 260 confounding variables was not classified with adequate precision. The CCI variable may be inaccurate  
7  
8 261 which is caused by the limited timeframe for inclusion of comorbidities. This increases the risk of  
9  
10 262 unaccounted confounding and should be taken into consideration when interpreting the results.  
11  
12 263 Participation and completion rates of in-hospital CR and CR in community centres remained unexplored  
13  
14  
15 264 as our study only focused on the referral process to CR.  
16

## 17 265 **Conclusion**

18  
19  
20 266 High income and educational level were associated with a larger chance of being informed about CR,  
21  
22 267 willingness to participate in CR, and assigned in-hospital CR in patients with ACS.  
23  
24

25 268  
26  
27  
28 269 **Acknowledgements:** None

29  
30  
31 270 **Contributorship statement:** CBG, RE, and MLL contributed to study design and acquisition  
32  
33  
34 271 of the data. CBG, MBJ, and MLL analysed and interpreted the data. SPJ, SR, and THO contributed to  
35  
36 272 interpretation. CBG drafted the initial manuscript and all authors critically revised the manuscript and  
37  
38 273 gave final approval.  
39  
40

41 274 **Ethics:** The study is approved by the Danish Data Protection Agency (project number: 2008-58-0028)  
42  
43  
44 275 and the Danish Patient Safety Authority (3-3013-2763/1). In Denmark, no written consent is needed for  
45  
46 276 use of such register-based data.  
47  
48

49 277 **Funding:** This work was supported by the Karen Elise Jensen's Foundation, and the Danish Heart  
50  
51 278 Foundation grant number: 18-R123-A8283-22081. The funders had no role in planning or conducting  
52  
53 279 the study.  
54  
55

56 280 **Competing interest:** None declared  
57  
58  
59  
60

1  
2  
3  
4 281 **Data sharing statement:** No data are available. Danish law dictates data access only to be  
5  
6  
7 282 available to researchers directly responsible for study conduction.  
8

9 283

## 11 284 **References**

- 12  
13  
14 285 1. Havranek EP, Mujahid MS, Barr DA, Blair I V., Cohen MS, Cruz-Flores S, et al. Social determinants  
15  
16 286 of risk and outcomes for cardiovascular disease: A scientific statement from the American Heart  
17  
18 287 Association. *Circulation*. 2015;132(9):873–98.  
19  
20  
21  
22 288 2. Schultz WM, Kelli HM, Lisko JC, Varghese T, Shen J, Sandesara P, et al. Socioeconomic Status and  
23  
24 289 Cardiovascular Outcomes. *Circulation*. 2018;137(20):2166–78.  
25  
26  
27 290 3. Ohm J, Skoglund PH, Discacciati A, Sundström J, Hambraeus K, Jernberg T, et al. Socioeconomic  
28  
29 291 status predicts second cardiovascular event in 29,226 survivors of a first myocardial infarction.  
30  
31 292 *Eur J Prev Cardiol*. 2018;25(9):985–93.  
32  
33  
34 293 4. Piepoli MF, Corra U, Adamopoulos S, Benzer W, Bjarnason-wehrens B, Cupples M, et al.  
35  
36 294 Secondary prevention in the clinical management of patients with cardiovascular diseases . Core  
37  
38 295 components , standards and outcome measures for referral and delivery. *Eur J Prev Cardiol*.  
39  
40 296 2014;21(6):664–81.  
41  
42  
43  
44 297 5. Rasmussen JN, Rasmussen S, Gislason GH, Buch P, Abildstrom SZ, Køber L, et al. Mortality after  
45  
46 298 acute myocardial infarction according to income and education. *J Epidemiol Community Health*.  
47  
48 299 2006;60(4):351–6.  
49  
50  
51 300 6. Anderson L, Oldridge N, Thompson DR, Zwisler A-D, Rees K, Martin N, et al. Exercise-Based  
52  
53 301 Cardiac Rehabilitation for Coronary Heart Disease. *J Am Coll Cardiol*. 2016;67(1):1–12.  
54  
55  
56 302 7. Anderson LJ, Taylor RS. Cardiac rehabilitation for people with heart disease: An overview of  
57  
58 303 Cochrane systematic reviews. *Int J Cardiol*. 2014;177(2):348–61.  
59  
60

- 1  
2  
3  
4 304 8. Rauch B, Davos CH, Doherty P, Saure D, Metzendorf MI, Salzwedel A, et al. The prognostic effect  
5  
6 305 of cardiac rehabilitation in the era of acute revascularisation and statin therapy: A systematic  
7  
8 306 review and meta-analysis of randomized and non-randomized studies - The Cardiac  
9  
10 307 Rehabilitation Outcome Study (CROS). *Eur J Prev Cardiol.* 2016;23(18):1914–39.
- 11  
12  
13 308 9. Sumner J, Grace SL, Doherty P. Predictors of Cardiac Rehabilitation Utilization in England :  
14  
15 309 Results From the National Audit. *J Am Heart Assoc.* 2016;5:1–8.
- 16  
17  
18 310 10. Colella TJ, Gravely S, Marzolini S, Grace SL, Francis JA, Oh P, et al. Sex bias in referral of women  
19  
20 311 to outpatient cardiac rehabilitation? A meta-analysis. *Eur J Prev Cardiol.* 2015;22(4):423–41.
- 21  
22  
23 312 11. Martin B-J, Hauer T, Arena R, Austford LD, Galbraith PD, Lewin a. M, et al. Cardiac Rehabilitation  
24  
25 313 Attendance and Outcomes in Coronary Artery Disease Patients. *Circulation.* 2012;126(6):677–87.
- 26  
27  
28 314 12. Piepoli MF, Hoes AW, Agewall S, Albus C, Brotons C, Catapano AL, et al. 2016 European  
29  
30 315 Guidelines on cardiovascular disease prevention in clinical practice. *Eur Heart J.*  
31  
32 316 2016;37(29):2315–81.
- 33  
34  
35 317 13. Smith SC, Benjamin EJ, Bonow RO, Braun LT, Creager MA, Franklin BA, et al. AHA/ACCF  
36  
37 318 secondary prevention and risk reduction therapy for patients with coronary and other  
38  
39 319 atherosclerotic vascular disease: 2011 update: A guideline from the American Heart Association  
40  
41 320 and American College of Cardiology Foundation. *Circulation.* 2011;124(22):2458–73.
- 42  
43  
44 321 14. Gaalema DE, Elliott RJ, Morford ZH, Higgins ST, Ades PA. Effect of Socioeconomic Status on  
45  
46 322 Propensity to Change Risk Behaviors Following Myocardial Infarction : Implications for Healthy  
47  
48 323 Lifestyle Medicine. *Prog Cardiovasc Dis.* 2017;60(1):159–68.
- 49  
50  
51 324 15. Nielsen KM, Faergeman O, Foldspang A, Larsen ML. Cardiac rehabilitation: Health characteristics  
52  
53 325 and socio-economic status among those who do not attend. *Eur J Public Health.* 2008;18(5):479–  
54  
55 326 83.
- 56  
57  
58  
59  
60

- 1  
2  
3  
4 327 16. Neubeck L, Freedman S Ben, Clark AM, Briffa T, Bauman A, Redfern J. Participating in cardiac  
5  
6 328 rehabilitation: A systematic review and meta-synthesis of qualitative data. *Eur J Prev Cardiol.*  
7  
8 329 2012;19(3):494–503.  
9  
10  
11 330 17. von Elm E, Altman DG, Egger M, Pocock SJ, Gøtzsche PC, Vandenbroucke JP. The Strengthening  
12  
13 331 the Reporting of Observational Studies in Epidemiology (STROBE) statement: guidelines for  
14  
15 332 reporting observational studies. *J Clin Epidemiol.* 2008;61(4):344–9.  
16  
17  
18 333 18. Graversen CB, Eichhorst R, Ravn L, Christiansen SR, Johansen MB, Larsen ML, et al. Social  
19  
20 334 inequality and barriers to cardiac rehabilitation in the rehab-North register. *Scand Cardiovasc J.*  
21  
22 335 2017;51(6):316–22.  
23  
24  
25 336 19. Madsen M, Davidsen M, Rasmussen S, Abildstrom SZ, Osler M. The validity of the diagnosis of  
26  
27 337 acute myocardial infarction in routine statistics: A comparison of mortality and hospital  
28  
29 338 discharge data with the Danish MONICA registry. *J Clin Epidemiol.* 2003;56(2):124–30.  
30  
31  
32  
33 339 20. Baadsgaard M, Quitzau J. Danish registers on personal income and transfer payments. *Scand J*  
34  
35 340 *Public Health.* 2011;39(7):103–5.  
36  
37  
38 341 21. Eurostat Statistics Explained. International Standard Classification of Education (ISCED)  
39  
40 342 [Internet]. Available from: [https://ec.europa.eu/eurostat/statistics-](https://ec.europa.eu/eurostat/statistics-explained/index.php/International_Standard_Classification_of_Education_%28ISCED%29)  
41  
42 343 [explained/index.php/International\\_Standard\\_Classification\\_of\\_Education\\_%28ISCED%29](https://ec.europa.eu/eurostat/statistics-explained/index.php/International_Standard_Classification_of_Education_%28ISCED%29)  
43  
44  
45 344 22. Jensen VM, Rasmussen a. W. Danish education registers. *Scand J Public Health.* 2011;39(7  
46  
47 345 Suppl):91–4.  
48  
49  
50 346 23. Pedersen CB. The Danish Civil Registration System. *Scand J Public Health.* 2011;39(7 suppl):22–5.  
51  
52  
53 347 24. Thygesen SK, Christiansen CF, Lash TL, Christensen S, Sorensen HT. Predictive value of coding of  
54  
55 348 diagnoses in the charlson comorbidity index in the Danish national registry of patients.  
56  
57 349 *Pharmacoepidemiol Drug Saf.* 2009;18 (S1):S189.  
58  
59  
60



- 1  
2  
3  
4 350 25. Brown TM, Hernandez AF, Bittner V, Cannon CP, Ellrodt G, Liang L, et al. Predictors of Cardiac  
5  
6 351 Rehabilitation Referral in Coronary Artery Disease Patients. Findings From the American Heart  
7  
8 352 Association's Get With The Guidelines Program. *J Am Coll Cardiol*. 2009;54(6):515–21.  
9  
10  
11 353 26. Colbert JD, Martin B-J, Haykowsky MJ, Hauer TL, Austford LD, Arena RA, et al. Cardiac  
12  
13 354 rehabilitation referral, attendance and mortality in women. *Eur J Prev Cardiol*. 2014;22(8):979–  
14  
15 355 86.  
16  
17  
18 356 27. Meillier LK, Nielsen KM, Larsen FB, Larsen ML. Socially differentiated cardiac rehabilitation: Can  
19  
20 357 we improve referral, attendance and adherence among patients with first myocardial infarction?  
21  
22  
23 358 *Scand J Public Health*. 2012;40(3):286–93.  
24  
25  
26 359 28. Mackenbach JP. The persistence of social inequalities in modern welfare states: the explanation  
27  
28 360 of a paradox. *Soc Sci Med*. 2012;75:761–9.  
29  
30  
31 361 29. Mackenbach JP. Nordic paradox, Southern miracle, Eastern disaster: Persistence of inequalities  
32  
33 362 in mortality in Europe. *Eur J Public Health*. 2017;27:14–7.  
34  
35  
36 363 30. Tromp J, Collins S. Universal healthcare but not universal access? *Eur J Prev Cardiol*.  
37  
38 364 2019;27(1);75-8.s  
39  
40  
41 365 31. Cortés O, Arthur HM. Determinants of referral to cardiac rehabilitation programs in patients  
42  
43 366 with coronary artery disease: A systematic review. *Am Heart J*. 2006;151(2):249–56.  
44  
45  
46 367 32. Galobardes B, Shaw M, Lawlor DA, Lynch JW, Smith GD. Indicators of socioeconomic position  
47  
48 368 (part 1). *J Epidemiol Community Health*. 2006;60(1):7–12.  
49  
50  
51 369 33. Geyer S, Hemström Ö, Peter R, Vågerö D. Education, income, and occupational class cannot be  
52  
53 370 used interchangeably in social epidemiology. Empirical evidence against a common practice. *J*  
54  
55 371 *Epidemiol Community Health*. 2006;60(9):804–10.  
56  
57  
58 372 34. Lahelma E, Martikainen P, Laaksonen M, Aittomäki A. Pathways between socioeconomic  
59  
60

- 1  
2  
3  
4 373 determinants of health. *J Epidemiol Community Health*. 2004;58(4):327–32.  
5  
6 374 35. Schmidt M, Schmidt SAJ, Sandegaard JL, Ehrenstein V, Pedersen L, Sørensen HT. The Danish  
7  
8  
9 375 National patient registry: A review of content, data quality, and research potential. *Clin*  
10  
11 376 *Epidemiol*. 2015;7:449–90.  
12  
13

14 377

17 378 **Figure legends:**

19 379 Figure 1: Flowchart of the referral process to cardiac rehabilitation.

20 380 STEMI: ST-Elevated-Myocardial Infarction, NSTEMI: Non-ST-Elevated-Myocardial Infarction, UAP:

21 381 Unstable Angina Pectoris, CR: Cardiac rehabilitation, CABG: Coronary artery bypass graft, SES: Socio-

22 382 economic Status  
23  
24  
25  
26  
27  
28  
29  
30  
31  
32  
33  
34  
35  
36  
37  
38  
39  
40  
41  
42  
43  
44  
45  
46  
47  
48  
49  
50  
51  
52  
53  
54  
55  
56  
57  
58  
59  
60

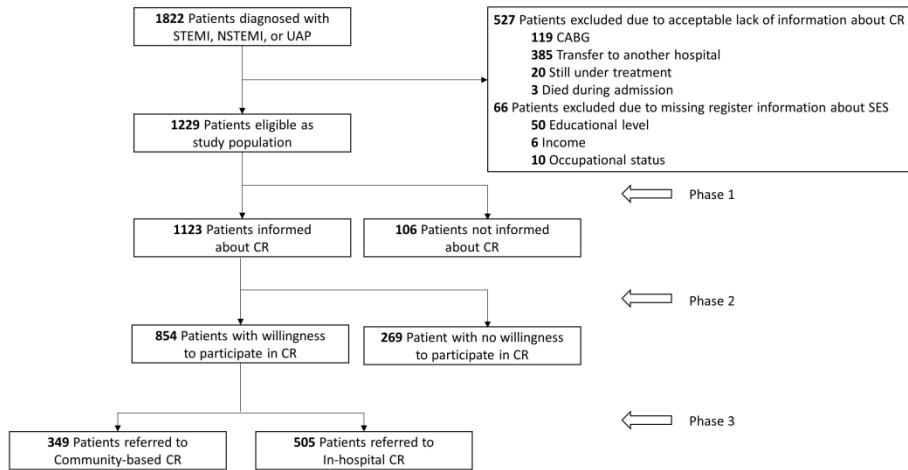

Figure 1: Flowchart of the referral process to cardiac rehabilitation.  
 STEMI: ST-Elevated-Myocardial Infarction, NSTEMI: Non-ST-Elevated-Myocardial Infarction, UAP: Unstable Angina Pectoris, CR: Cardiac rehabilitation, CABG: Coronary artery bypass graft, SES: Socio-economic Status

338x190mm (300 x 300 DPI)

1  
2  
3  
4 **ONLINE SUPPLEMENTARY MATERIAL**  
5

6  
7 **Table S1:** Baseline Characteristics of excluded patients

|                             | Excluded |
|-----------------------------|----------|
| Characteristics             | n = 593  |
| Male (n, %)                 | 423      |
| Age Group (years)           |          |
| < 65                        | 242      |
| 65-74                       | 171      |
| ≥ 75                        | 180      |
| Civil status (n, %)         |          |
| Married/Partnership         | 378      |
| Divorced/Unmarried/Widow    | >210     |
| Missing                     | <5       |
| Occupational status (n, %)  |          |
| Employed                    | 158      |
| Unemployed/out of workforce | 417      |
| Missing                     | 18       |
| Educational level (n, %)    |          |
| Low                         | 256      |
| Medium                      | 200      |
| High                        | 52       |
| Missing                     | 72       |
| Income, tertile (n, %)      |          |
| Low                         | 245      |
| Medium                      | 197      |
| High                        | >145     |
| Missing                     | <5       |
| Charlson Comorbidity Index  |          |
| Low (0 points)              | 421      |
| Moderate/High (>0 points)   | 75       |
| Missing                     | 97       |

**Table S2:** Logistic regression model for those excluded compared with those included in the study population,  
n = 1822

|                          | n, (%)       | Unadjusted |           | Multivariable adjusted* |           |
|--------------------------|--------------|------------|-----------|-------------------------|-----------|
|                          |              | OR         | 95% CI    | OR                      | 95% CI    |
| Observations             | 593 (32.5)   |            |           |                         |           |
| Civil status             |              |            |           |                         |           |
| Married/Partnership      | 378 (20.7)   | 1 (ref.)   |           | 1 (ref.)                |           |
| Divorced/Unmarried/Widow | >210 (>11.5) | 1.02       | 0.83-1.25 | 0.85                    | 0.67-1.07 |
| Missing                  | <5 (<1)      |            |           |                         |           |
| Occupational status      |              |            |           |                         |           |
| Employed                 | 158 (8.7)    | 1 (ref.)   |           | 1 (ref.)                |           |
| Unemployed/Retired       | 417 (22.9)   | 1.69       | 1.36-2.09 | 1.54                    | 1.14-2.08 |
| Missing                  | 18 (1.0)     |            |           |                         |           |
| Educational level        |              |            |           |                         |           |
| Low                      | 256 (14.1)   | 1 (ref.)   |           | 1 (ref.)                |           |
| Medium                   | 200 (10.1)   | 0.77       | 0.61-0.96 | 0.77                    | 0.61-0.97 |
| High                     | 49 (2.7)     | 0.59       | 0.42-0.84 | 0.60                    | 0.41-0.87 |
| Missing                  | 72 (4.0)     |            |           |                         |           |
| Income, tertiles         |              |            |           |                         |           |
| Low                      | 245 (13.4)   | 1 (ref.)   |           | 1 (ref.)                |           |
| Medium                   | 197 (10.8)   | 0.71       | 0.56-0.90 | 0.77                    | 0.59-1.01 |
| High                     | >145 (>7.9)  | 0.46       | 0.36-0.59 | 0.55                    | 0.40-0.75 |
| Missing                  | <5 (<0.3)    |            |           |                         |           |

\* Adjusted for age, gender, ACS diagnosis, Charlson Comorbidity Index. OR: odds ratio; CI: confidence interval

**STROBE 2007 (v4) Statement—Checklist of items that should be included in reports of *cross-sectional studies***

| Section/Topic                | Item # | Recommendation                                                                                                                                                                       | Reported on page # |
|------------------------------|--------|--------------------------------------------------------------------------------------------------------------------------------------------------------------------------------------|--------------------|
| <b>Title and abstract</b>    | 1      | (a) Indicate the study's design with a commonly used term in the title or the abstract                                                                                               | 1                  |
|                              |        | (b) Provide in the abstract an informative and balanced summary of what was done and what was found                                                                                  | 2                  |
| <b>Introduction</b>          |        |                                                                                                                                                                                      |                    |
| Background/rationale         | 2      | Explain the scientific background and rationale for the investigation being reported                                                                                                 | 3-4                |
| Objectives                   | 3      | State specific objectives, including any prespecified hypotheses                                                                                                                     | 4                  |
| <b>Methods</b>               |        |                                                                                                                                                                                      |                    |
| Study design                 | 4      | Present key elements of study design early in the paper                                                                                                                              | 5                  |
| Setting                      | 5      | Describe the setting, locations, and relevant dates, including periods of recruitment, exposure, follow-up, and data collection                                                      | 5                  |
| Participants                 | 6      | (a) Give the eligibility criteria, and the sources and methods of selection of participants                                                                                          | 5-6                |
| Variables                    | 7      | Clearly define all outcomes, exposures, predictors, potential confounders, and effect modifiers. Give diagnostic criteria, if applicable                                             | 6-7                |
| Data sources/<br>measurement | 8*     | For each variable of interest, give sources of data and details of methods of assessment (measurement). Describe comparability of assessment methods if there is more than one group | 7                  |
| Bias                         | 9      | Describe any efforts to address potential sources of bias                                                                                                                            | 7                  |
| Study size                   | 10     | Explain how the study size was arrived at                                                                                                                                            | 5-6                |
| Quantitative variables       | 11     | Explain how quantitative variables were handled in the analyses. If applicable, describe which groupings were chosen and why                                                         | 6-7                |
| Statistical methods          | 12     | (a) Describe all statistical methods, including those used to control for confounding                                                                                                | 7                  |
|                              |        | (b) Describe any methods used to examine subgroups and interactions                                                                                                                  | 7-8                |
|                              |        | (c) Explain how missing data were addressed                                                                                                                                          | 5                  |
|                              |        | (d) If applicable, describe analytical methods taking account of sampling strategy                                                                                                   | N/A                |
|                              |        | (e) Describe any sensitivity analyses                                                                                                                                                | 7-8                |
| <b>Results</b>               |        |                                                                                                                                                                                      |                    |

|                          |     |                                                                                                                                                                                                              |       |
|--------------------------|-----|--------------------------------------------------------------------------------------------------------------------------------------------------------------------------------------------------------------|-------|
| Participants             | 13* | (a) Report numbers of individuals at each stage of study—eg numbers potentially eligible, examined for eligibility, confirmed eligible, included in the study, completing follow-up, and analysed            | 8     |
|                          |     | (b) Give reasons for non-participation at each stage                                                                                                                                                         | 8     |
|                          |     | (c) Consider use of a flow diagram                                                                                                                                                                           | 8     |
| Descriptive data         | 14* | (a) Give characteristics of study participants (eg demographic, clinical, social) and information on exposures and potential confounders                                                                     | 8-9   |
|                          |     | (b) Indicate number of participants with missing data for each variable of interest                                                                                                                          | 6     |
| Outcome data             | 15* | Report numbers of outcome events or summary measures                                                                                                                                                         | 6+8   |
| Main results             | 16  | (a) Give unadjusted estimates and, if applicable, confounder-adjusted estimates and their precision (eg, 95% confidence interval). Make clear which confounders were adjusted for and why they were included | 9-12  |
|                          |     | (b) Report category boundaries when continuous variables were categorized                                                                                                                                    | 9-12  |
|                          |     | (c) If relevant, consider translating estimates of relative risk into absolute risk for a meaningful time period                                                                                             | N/A   |
| Other analyses           | 17  | Report other analyses done—eg analyses of subgroups and interactions, and sensitivity analyses                                                                                                               | 12    |
| <b>Discussion</b>        |     |                                                                                                                                                                                                              |       |
| Key results              | 18  | Summarise key results with reference to study objectives                                                                                                                                                     | 12-13 |
| Limitations              | 19  | Discuss limitations of the study, taking into account sources of potential bias or imprecision. Discuss both direction and magnitude of any potential bias                                                   | 14-15 |
| Interpretation           | 20  | Give a cautious overall interpretation of results considering objectives, limitations, multiplicity of analyses, results from similar studies, and other relevant evidence                                   | 13-15 |
| Generalisability         | 21  | Discuss the generalisability (external validity) of the study results                                                                                                                                        | 14    |
| <b>Other information</b> |     |                                                                                                                                                                                                              |       |
| Funding                  | 22  | Give the source of funding and the role of the funders for the present study and, if applicable, for the original study on which the present article is based                                                | 16    |

\*Give information separately for cases and controls in case-control studies and, if applicable, for exposed and unexposed groups in cohort and cross-sectional studies.

**Note:** An Explanation and Elaboration article discusses each checklist item and gives methodological background and published examples of transparent reporting. The STROBE checklist is best used in conjunction with this article (freely available on the Web sites of PLoS Medicine at <http://www.plosmedicine.org/>, Annals of Internal Medicine at <http://www.annals.org/>, and Epidemiology at <http://www.epidem.com/>). Information on the STROBE Initiative is available at [www.strobe-statement.org](http://www.strobe-statement.org).
