# Supplementary material for: Influence of socioeconomic status on the referral process to cardiac rehabilitation following acute coronary syndrome: a cross-sectional study
Source: PubMed Central journal article supplement — BMJ Open. 2020 Apr 9;10(4):e036088. doi: 10.1136/bmjopen-2019-036088 (PMC7170636; doi:10.1136/bmjopen-2019-036088), 2020-04-09
Supplement: bmjopen-2019-036088supp001.pdf [file bmjopen-2019-036088supp001.pdf]

**ONLINE SUPPLEMENTARY MATERIAL****Table S1:** Baseline Characteristics of excluded patients

|                             | Excluded |
|-----------------------------|----------|
| Characteristics             | n = 593  |
| Male (n, %)                 | 423      |
| Age Group (years)           |          |
| < 65                        | 242      |
| 65-74                       | 171      |
| ≥ 75                        | 180      |
| Civil status (n, %)         |          |
| Married/Partnership         | 378      |
| Divorced/Unmarried/Widow    | >210     |
| Missing                     | <5       |
| Occupational status (n, %)  |          |
| Employed                    | 158      |
| Unemployed/out of workforce | 417      |
| Missing                     | 18       |
| Educational level (n, %)    |          |
| Low                         | 256      |
| Medium                      | 200      |
| High                        | 52       |
| Missing                     | 72       |
| Income, tertile (n, %)      |          |
| Low                         | 245      |
| Medium                      | 197      |
| High                        | >145     |
| Missing                     | <5       |
| Charlson Comorbidity Index  |          |
| Low (0 points)              | 421      |
| Moderate/High (>0 points)   | 75       |
| Missing                     | 97       |

**Table S2:** Logistic regression model for those excluded compared with those included in the study population,

n = 1822

|                          | n, (%)       | Unadjusted |           | Multivariable adjusted* |           |
|--------------------------|--------------|------------|-----------|-------------------------|-----------|
|                          |              | OR         | 95% CI    | OR                      | 95% CI    |
| Observations             | 593 (32.5)   |            |           |                         |           |
| Civil status             |              |            |           |                         |           |
| Married/Partnership      | 378 (20.7)   | 1 (ref.)   |           | 1 (ref.)                |           |
| Divorced/Unmarried/Widow | >210 (>11.5) | 1.02       | 0.83-1.25 | 0.85                    | 0.67-1.07 |
| Missing                  | <5 (<1)      |            |           |                         |           |
| Occupational status      |              |            |           |                         |           |
| Employed                 | 158 (8.7)    | 1 (ref.)   |           | 1 (ref.)                |           |
| Unemployed/Retired       | 417 (22.9)   | 1.69       | 1.36-2.09 | 1.54                    | 1.14-2.08 |
| Missing                  | 18 (1.0)     |            |           |                         |           |
| Educational level        |              |            |           |                         |           |
| Low                      | 256 (14.1)   | 1 (ref.)   |           | 1 (ref.)                |           |
| Medium                   | 200 (10.1)   | 0.77       | 0.61-0.96 | 0.77                    | 0.61-0.97 |
| High                     | 49 (2.7)     | 0.59       | 0.42-0.84 | 0.60                    | 0.41-0.87 |
| Missing                  | 72 (4.0)     |            |           |                         |           |
| Income, tertiles         |              |            |           |                         |           |
| Low                      | 245 (13.4)   | 1 (ref.)   |           | 1 (ref.)                |           |
| Medium                   | 197 (10.8)   | 0.71       | 0.56-0.90 | 0.77                    | 0.59-1.01 |
| High                     | >145 (>7.9)  | 0.46       | 0.36-0.59 | 0.55                    | 0.40-0.75 |
| Missing                  | <5 (<0.3)    |            |           |                         |           |

\* Adjusted for age, gender, ACS diagnosis, Charlson Comorbidity Index. OR: odds ratio; CI: confidence interval
